# Supplementary material for: Assessing biological variation and protein processing in primary human leukocytes by automated multiplex stable isotope labeling coupled to 2 dimensional peptide separation
Source: Royal Society of Chemistry journal article supplement (doi:10.1039/b901873e), 2009-05-06
Supplement: b901873e.pdf [file b901873e.pdf]

## Supplementary Figure 1

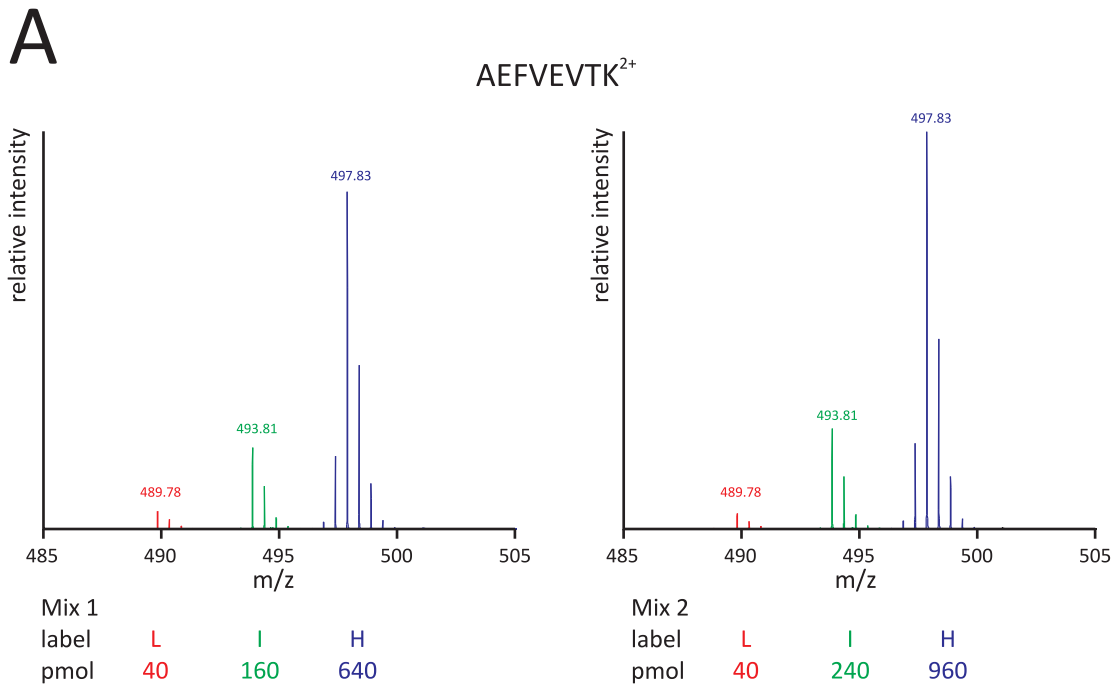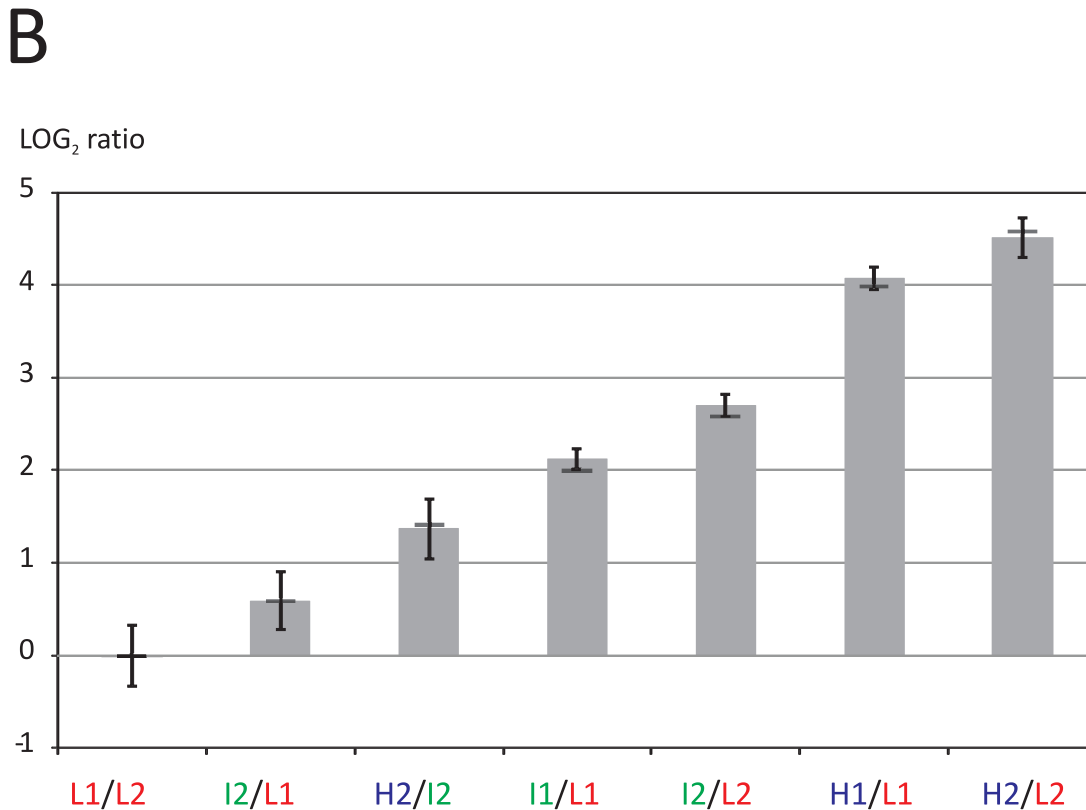

**Figure S1.** (A) Representative mass spectra (doubly charged peptide AEFVEVTK) for two independent triple labeling experiments of different amounts of tryptic BSA. The light isotopomers are indicated in red, the intermediate isotopomers in green and the heavy isotopomers in blue. The amount of BSA injected for each labeling event is indicated below the mass spectra. (B) Using a set of 10 peptide triplets which could consistently be quantified between the two independent experiments, we calculated log<sub>2</sub> ratios for several combinations and compared them to the expected ratios. The observed ratios are depicted as light grey columns, with the standard deviations indicated and the expected ratio marked with a dark grey bar.

## Supplementary Figure 2

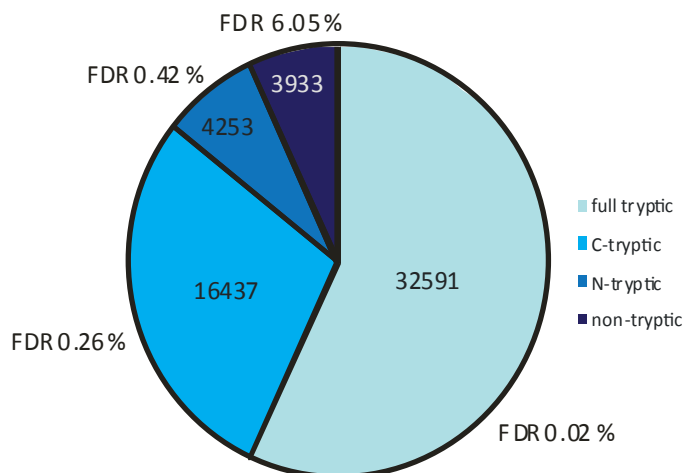

**Figure S2.** Pie chart showing the contribution of non-tryptic (dark blue, white letters), semi-tryptic (dark blue, black letters for peptides with a tryptic N-terminus and light blue for peptides with a tryptic C-terminus) and fully tryptic peptides (cyan) to the total pool of peptides identified at a Mascot cut-off ion score of 30. Next to each group is the false discovery rate (FDR) for that specific set of peptides, showing that the non-tryptic peptides gave the largest relative number of hits to decoy proteins.

## Supplementary Figure 3

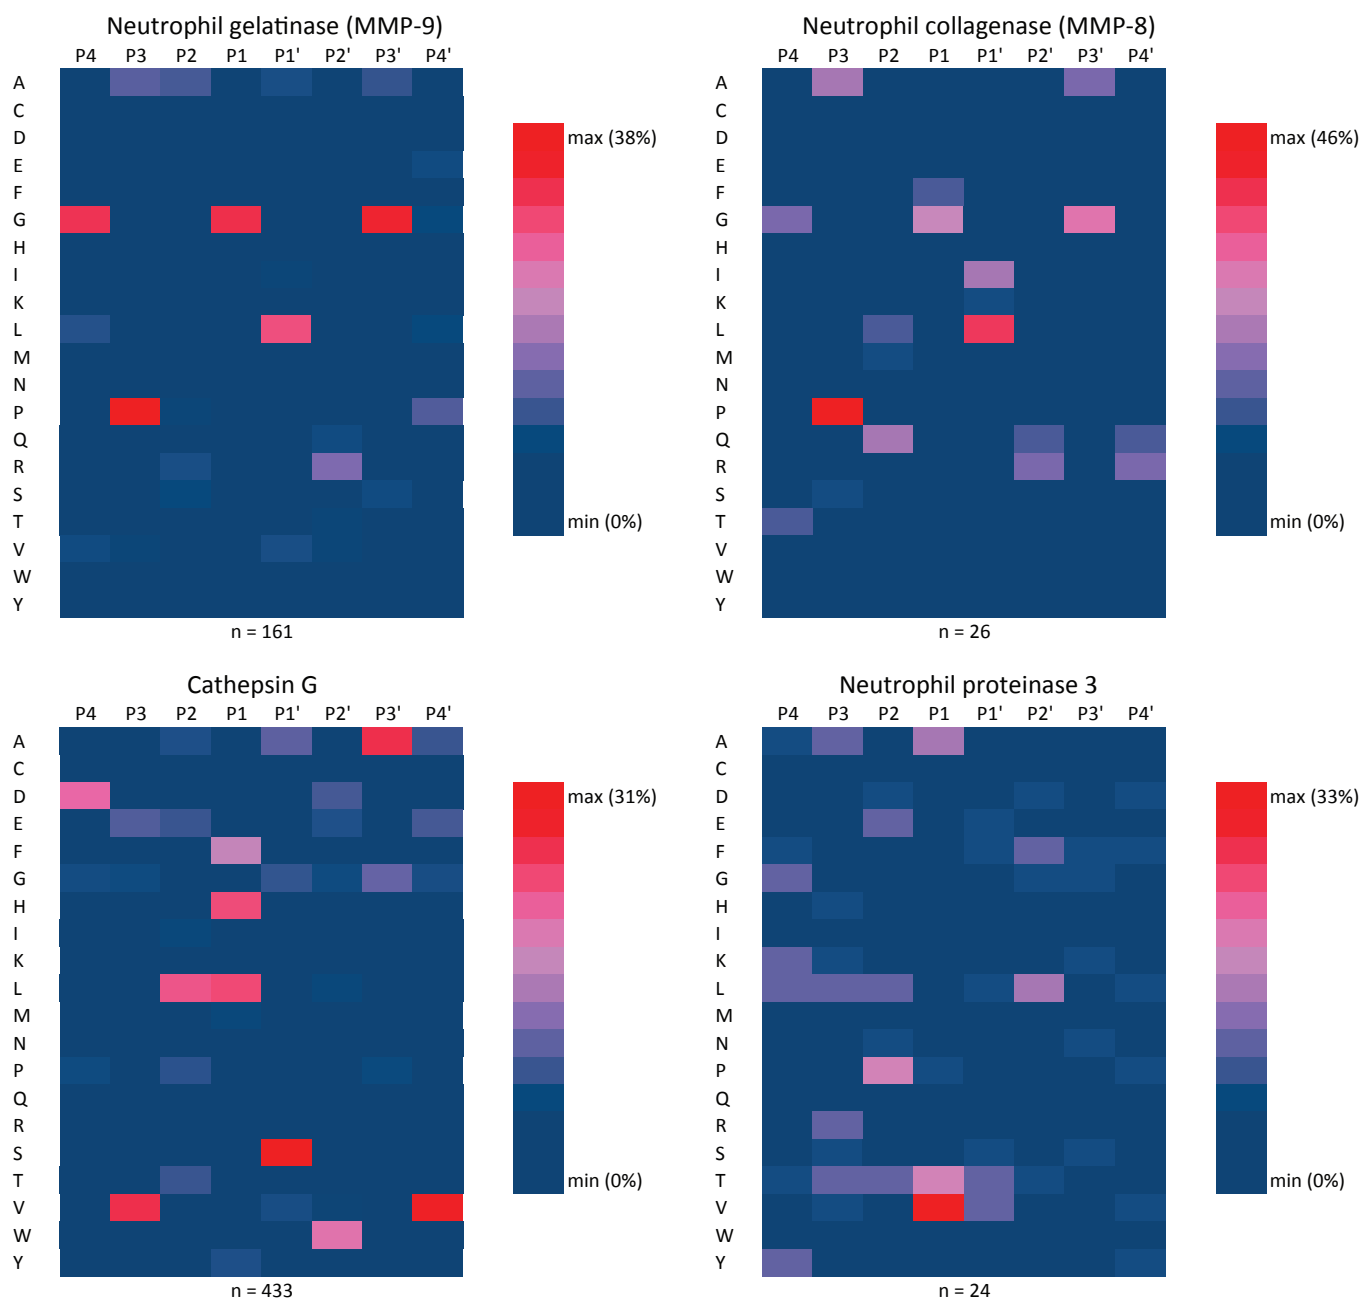

**Figure S3.** Heat maps showing the specificity matrix for four proteases known to be present in neutrophil granulocytes, using data derived from the MEROPS database on proteases (<http://merops.sanger.ac.uk/>). Shown are heatmaps for neutrophil gelatinase (MMP-9, top left), neutrophil collagenase (MMP-8, top right), cathepsin G (bottom left) and neutrophil proteinase-3 (bottom right). The heat maps are colored relative to the most abundant amino acid in each specificity matrix, the abundance of which is indicated next to the color scale for each protease.

## Supplementary Figure 4

LOG2 ratio

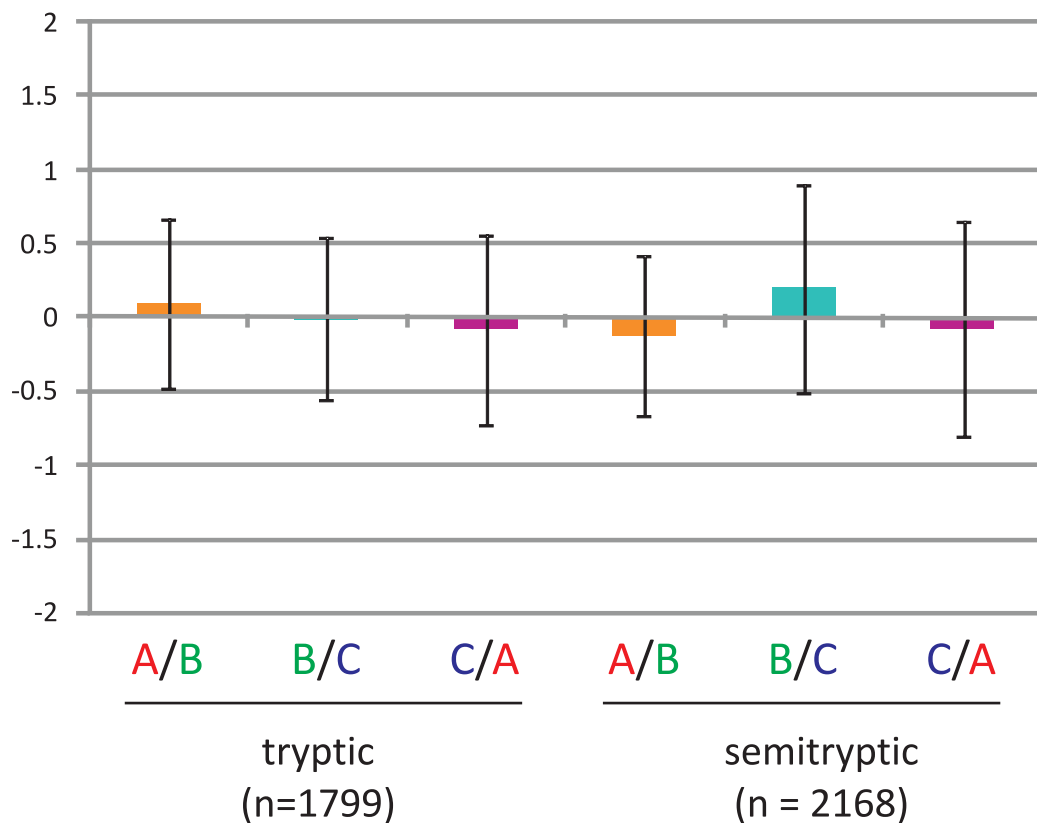

**Figure S4.** Graph showing the average and standard deviation of quantified peptides for each combination of donors (A over B in orange, B over C in cyan and C over A in magenta), separated in tryptic (left three bars) and semi-tryptic peptides (right three bars). The number of quantified peptides used to calculate the numbers are indicated below the graph.

## Supplementary Figure 5

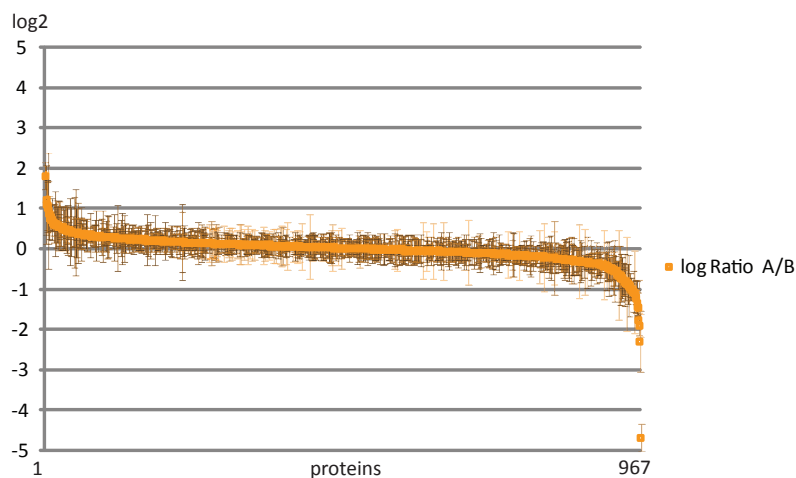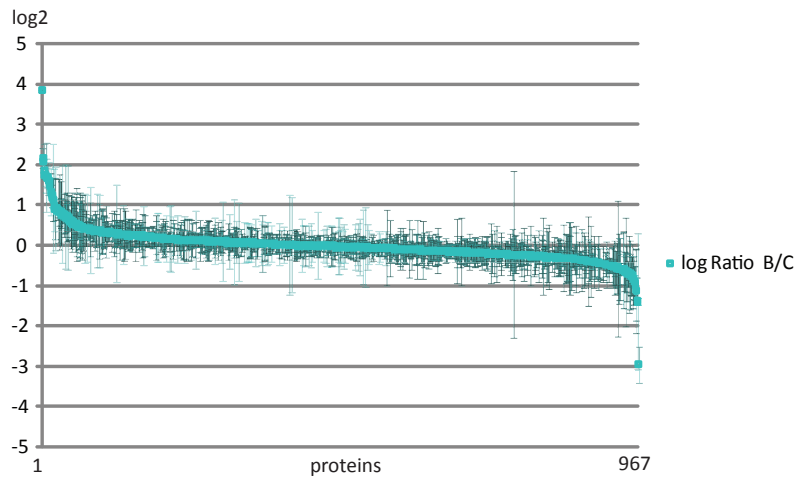

**Figure S5.** Plots of the log<sub>2</sub> of the ratios of donor A over donor B (colored orange) and donor B over donor C (colored cyan) for all 967 quantified proteins with their standard deviations indicated. The corresponding graph for donor C over donor A is present in the article as figure 6A.

| Swissprot ID | # peptides quantified | STDEV of log 2 ratios | log 2 Ratio A/B | (log 2) STDEV A/B | log 2 Ratio B/C | (log 2) STDEV B/C | log 2 Ratio C/A | (log 2) STDEV C/A |
|--------------|-----------------------|-----------------------|-----------------|-------------------|-----------------|-------------------|-----------------|-------------------|
| OLFM4_HUMAN  | 4                     | 4.730                 | -4.674          | 0.343             | -0.027          | 0.157             | 4.785           | 0.298             |
| NQO2_HUMAN   | 2                     | 3.383                 | -1.343          | 0.316             | 3.855           | 0.030             | -2.496          | 0.346             |
| K22E_HUMAN   | 2                     | 3.169                 | -0.381          | 0.008             | -2.953          | 0.448             | 3.349           | 0.456             |
| GP1BB_HUMAN  | 4                     | 1.990                 | -2.275          | 0.758             | 1.655           | 0.408             | 0.230           | 0.679             |
| PLBL1_HUMAN  | 9                     | 1.846                 | -1.899          | 0.277             | -0.075          | 0.510             | 1.793           | 0.440             |
| FIBA_HUMAN   | 8                     | 1.843                 | -0.998          | 0.284             | 2.165           | 0.246             | -1.054          | 0.282             |
| LTB1L_HUMAN  | 2                     | 1.816                 | -0.880          | 0.105             | 2.094           | 0.437             | -1.198          | 0.332             |
| TBB1_HUMAN   | 6                     | 1.650                 | -1.000          | 0.211             | 1.855           | 0.035             | -1.005          | 0.308             |
| PADI4_HUMAN  | 21                    | 1.577                 | 1.818           | 0.329             | -1.129          | 0.331             | -0.630          | 0.332             |
| ILEU_HUMAN   | 11                    | 1.574                 | -0.267          | 0.399             | 1.697           | 0.860             | -1.415          | 0.582             |
| B3AT_HUMAN   | 5                     | 1.544                 | -1.738          | 0.155             | -0.101          | 0.431             | 1.347           | 1.167             |
| SDPR_HUMAN   | 2                     | 1.525                 | -1.032          | 0.184             | 1.756           | 0.072             | -0.709          | 0.112             |
| FIBG_HUMAN   | 13                    | 1.510                 | -0.995          | 0.192             | 1.743           | 0.427             | -0.729          | 0.395             |
| FIBB_HUMAN   | 8                     | 1.507                 | -1.160          | 0.196             | 1.697           | 0.281             | -0.563          | 0.408             |
| ITB3_HUMAN   | 4                     | 1.500                 | -0.935          | 0.329             | 1.752           | 0.270             | -0.747          | 0.042             |
| PLF4_HUMAN   | 2                     | 1.446                 | -1.177          | 0.418             | 1.618           | 0.001             | -0.426          | 0.417             |
| ITA2B_HUMAN  | 6                     | 1.428                 | -1.037          | 0.508             | 1.690           | 0.238             | -0.408          | 0.631             |
| CXCL7_HUMAN  | 5                     | 1.428                 | -0.859          | 0.138             | 1.584           | 0.199             | -0.918          | 0.293             |
| SPTA1_HUMAN  | 3                     | 1.347                 | -1.446          | 0.692             | 0.246           | 0.531             | 1.215           | 0.545             |
| BPL_HUMAN    | 25                    | 1.336                 | -1.419          | 0.339             | 1.228           | 0.272             | 0.222           | 0.511             |
| API5_HUMAN   | 2                     | 1.278                 | 1.112           | 0.974             | -1.394          | 1.684             | 0.297           | 0.710             |
| TSP1_HUMAN   | 13                    | 1.260                 | -0.752          | 0.402             | 1.502           | 0.287             | -0.600          | 0.519             |
| AMPD3_HUMAN  | 3                     | 1.260                 | -1.227          | 0.420             | -0.047          | 0.357             | 1.290           | 0.541             |
| H10_HUMAN    | 2                     | 1.206                 | 0.620           | 0.059             | -1.384          | 0.085             | 0.780           | 0.143             |
| MMRN1_HUMAN  | 2                     | 1.157                 | -0.822          | 0.460             | 1.327           | 0.573             | -0.490          | 0.113             |
| CHIT1_HUMAN  | 4                     | 1.151                 | 1.215           | 0.870             | -0.933          | 0.409             | -0.578          | 0.353             |
| PDL1_HUMAN   | 2                     | 1.144                 | -0.542          | 0.228             | 1.320           | 0.020             | -0.762          | 0.248             |
| REPS2_HUMAN  | 2                     | 1.125                 | -1.063          | 1.014             | 1.179           | 1.342             | -0.101          | 0.328             |
| PRTN3_HUMAN  | 38                    | 1.092                 | -0.865          | 0.490             | -0.312          | 0.553             | 1.241           | 0.718             |
| LMAN1_HUMAN  | 2                     | 1.058                 | 0.343           | 0.543             | 0.853           | 0.786             | -1.180          | 0.243             |
| ST1A1_HUMAN  | 5                     | 1.016                 | -1.056          | 0.151             | 0.970           | 1.107             | 0.088           | 0.115             |
| SMD3_HUMAN   | 2                     | 0.989                 | 1.033           | 0.607             | -0.078          | 0.532             | -0.939          | 1.139             |
| U520_HUMAN   | 2                     | 0.981                 | 0.642           | 0.481             | -1.124          | 1.060             | 0.498           | 0.579             |
| PGM2L_HUMAN  | 2                     | 0.979                 | -0.657          | 0.721             | 1.130           | 0.762             | -0.457          | 0.040             |
| LPPL_HUMAN   | 13                    | 0.965                 | 1.087           | 0.626             | -0.306          | 0.839             | -0.766          | 0.818             |
| TCO1_HUMAN   | 3                     | 0.956                 | 0.072           | 0.583             | -0.983          | 0.887             | 0.926           | 1.072             |
| AP3D1_HUMAN  | 2                     | 0.929                 | 0.276           | 0.817             | 0.769           | 0.211             | -1.030          | 0.606             |
| FNBP1_HUMAN  | 4                     | 0.896                 | -0.934          | 0.100             | 0.070           | 0.130             | 0.854           | 0.831             |
| TBA4A_HUMAN  | 3                     | 0.878                 | -0.917          | 0.756             | 0.102           | 0.101             | 0.830           | 0.857             |
| S10AC_HUMAN  | 4                     | 0.873                 | 0.254           | 0.131             | 1.135           | 0.513             | -0.610          | 1.220             |
| SPB9_HUMAN   | 4                     | 0.872                 | 0.028           | 0.190             | 0.794           | 0.350             | -0.946          | 0.522             |
| HBD_HUMAN    | 4                     | 0.854                 | -1.063          | 0.099             | 0.341           | 0.349             | 0.481           | 0.206             |
| DPP2_HUMAN   | 2                     | 0.853                 | -0.050          | 0.192             | 0.885           | 0.066             | -0.819          | 0.258             |
| F13A_HUMAN   | 3                     | 0.842                 | -0.720          | 0.019             | 0.909           | 0.074             | -0.275          | 0.091             |
| SEPT9_HUMAN  | 3                     | 0.840                 | 0.949           | 1.444             | -0.663          | 1.348             | -0.271          | 0.136             |
| CC50A_HUMAN  | 2                     | 0.836                 | 0.017           | 0.142             | 0.835           | 0.938             | -0.837          | 0.797             |
| SRPK1_HUMAN  | 2                     | 0.823                 | -0.196          | 0.362             | 0.910           | 0.756             | -0.698          | 0.395             |
| ELOC_HUMAN   | 2                     | 0.816                 | -0.664          | 0.731             | -0.235          | 0.173             | 0.914           | 0.904             |
| TPSN_HUMAN   | 3                     | 0.793                 | 0.151           | 0.021             | -0.851          | 0.481             | 0.715           | 0.501             |
| SIRBL_HUMAN  | 2                     | 0.792                 | -0.533          | 0.763             | 0.914           | 1.042             | -0.366          | 0.279             |
| IFS1_HUMAN   | 5                     | 0.792                 | -0.320          | 0.813             | -0.440          | 0.042             | 0.987           | 0.621             |
| CASP3_HUMAN  | 2                     | 0.791                 | 0.868           | 0.100             | -0.166          | 0.270             | -0.686          | 0.170             |
| EEA1_HUMAN   | 2                     | 0.776                 | 0.384           | 0.399             | -0.888          | 0.153             | 0.519           | 0.246             |
| PTN7_HUMAN   | 2                     | 0.776                 | 0.901           | 0.776             | -0.460          | 0.443             | -0.426          | 0.333             |
| IGHG1_HUMAN  | 5                     | 0.771                 | -0.721          | 0.504             | 0.814           | 0.326             | -0.077          | 0.181             |
| NIT1_HUMAN   | 3                     | 0.766                 | 0.582           | 0.615             | -0.865          | 0.615             | 0.298           | 0.061             |
| RAB21_HUMAN  | 2                     | 0.765                 | -0.076          | 0.204             | 0.807           | 0.797             | -0.716          | 0.593             |
| FCG3A_HUMAN  | 2                     | 0.751                 | -0.856          | 1.162             | 0.349           | 0.564             | 0.523           | 0.597             |
| KS6A3_HUMAN  | 3                     | 0.739                 | -0.765          | 0.633             | 0.073           | 0.329             | 0.707           | 0.429             |
| ALBU_HUMAN   | 31                    | 0.738                 | -0.806          | 0.340             | 0.426           | 0.344             | 0.513           | 0.661             |
| SRGN_HUMAN   | 4                     | 0.737                 | -0.292          | 0.338             | 0.845           | 0.153             | -0.537          | 0.299             |
| OST48_HUMAN  | 2                     | 0.735                 | -0.078          | 0.425             | 0.778           | 1.205             | -0.685          | 0.780             |
| CAH1_HUMAN   | 2                     | 0.720                 | 0.296           | 0.512             | -0.814          | 0.206             | 0.534           | 0.306             |
| PACN2_HUMAN  | 2                     | 0.719                 | 0.025           | 0.237             | 0.714           | 0.611             | -0.723          | 0.848             |
| IGKC_HUMAN   | 2                     | 0.717                 | -0.712          | 0.600             | 0.004           | 0.104             | 0.723           | 0.704             |
| A1AT_HUMAN   | 4                     | 0.717                 | -0.071          | 0.192             | 0.867           | 0.223             | -0.541          | 0.474             |
| P66B_HUMAN   | 2                     | 0.714                 | -0.540          | 0.203             | -0.258          | 0.030             | 0.813           | 0.233             |
| F16P1_HUMAN  | 3                     | 0.707                 | 0.680           | 0.226             | -0.730          | 0.194             | 0.065           | 0.391             |
| HBB_HUMAN    | 33                    | 0.704                 | -0.806          | 0.305             | 0.359           | 0.670             | 0.462           | 0.572             |
| MPRI_HUMAN   | 3                     | 0.700                 | -0.360          | 0.305             | 0.812           | 0.373             | -0.436          | 0.222             |
| LOX15_HUMAN  | 4                     | 0.695                 | -0.211          | 0.117             | -0.590          | 0.152             | 0.758           | 0.060             |
| UBP14_HUMAN  | 3                     | 0.691                 | 0.771           | 0.324             | -0.185          | 0.191             | -0.571          | 0.447             |
| AT2B4_HUMAN  | 2                     | 0.683                 | -0.400          | 0.172             | -0.378          | 0.230             | 0.794           | 0.401             |
| XPO2_HUMAN   | 2                     | 0.682                 | -0.644          | 1.115             | -0.056          | 0.031             | 0.715           | 1.146             |
| 3BP1_HUMAN   | 3                     | 0.680                 | 0.783           | 0.529             | -0.475          | 0.054             | -0.293          | 0.566             |
| DOC11_HUMAN  | 2                     | 0.679                 | 0.347           | 0.021             | 0.445           | 0.457             | -0.777          | 0.478             |
| RAB32_HUMAN  | 2                     | 0.679                 | -0.009          | 0.182             | -0.666          | 0.496             | 0.691           | 0.678             |
| H31_HUMAN    | 10                    | 0.673                 | 0.294           | 0.127             | 0.424           | 0.435             | -0.801          | 0.663             |
| SODC_HUMAN   | 3                     | 0.671                 | -0.204          | 0.515             | 0.756           | 0.525             | -0.536          | 0.981             |
| KAT_HUMAN    | 2                     | 0.666                 | 0.253           | 0.319             | -0.750          | 0.495             | 0.512           | 0.177             |
| NH2L1_HUMAN  | 2                     | 0.665                 | -0.128          | 0.001             | -0.583          | 0.761             | 0.727           | 0.762             |
| TRI25_HUMAN  | 3                     | 0.663                 | 0.398           | 0.048             | -0.760          | 0.800             | 0.378           | 0.768             |
| LYSC_HUMAN   | 16                    | 0.663                 | -0.639          | 0.358             | 0.147           | 0.226             | 0.679           | 0.352             |
| PUR9_HUMAN   | 3                     | 0.661                 | -0.029          | 0.369             | 0.683           | 0.561             | -0.638          | 0.415             |
| DPYL2_HUMAN  | 3                     | 0.656                 | 0.733           | 0.059             | -0.175          | 0.090             | -0.542          | 0.052             |
| FCN1_HUMAN   | 6                     | 0.649                 | 0.736           | 0.524             | -0.220          | 0.286             | -0.501          | 0.547             |
| HBA_HUMAN    | 33                    | 0.648                 | -0.742          | 0.231             | 0.354           | 0.532             | 0.404           | 0.540             |
| AT2A3_HUMAN  | 7                     | 0.645                 | -0.074          | 0.250             | 0.725           | 0.430             | -0.552          | 0.108             |
| T2FA_HUMAN   | 2                     | 0.645                 | 0.190           | 0.193             | -0.712          | 0.499             | 0.537           | 0.306             |
| ILK_HUMAN    | 5                     | 0.644                 | -0.408          | 0.082             | 0.702           | 0.317             | -0.420          | 0.227             |
| TPM4_HUMAN   | 11                    | 0.635                 | -0.471          | 0.320             | 0.724           | 0.386             | -0.248          | 0.130             |
| RNAS2_HUMAN  | 8                     | 0.634                 | 0.398           | 0.741             | -0.726          | 0.855             | 0.343           | 0.798             |
| STBD1_HUMAN  | 2                     | 0.631                 | -0.252          | 0.315             | 0.724           | 1.285             | -0.456          | 1.600             |
| AL9A1_HUMAN  | 2                     | 0.627                 | 0.224           | 0.632             | -0.702          | 0.327             | 0.493           | 0.305             |
| PSB7_HUMAN   | 2                     | 0.624                 | 0.274           | 0.016             | -0.709          | 0.950             | 0.450           | 0.934             |
| PRDX2_HUMAN  | 8                     | 0.623                 | -0.533          | 0.468             | -0.224          | 0.665             | 0.667           | 0.205             |
| S10AB_HUMAN  | 6                     | 0.622                 | 0.048           | 0.144             | 0.566           | 0.587             | -0.673          | 0.691             |

|             |    |       |        |       |        |       |        |       |
|-------------|----|-------|--------|-------|--------|-------|--------|-------|
| SFRS2_HUMAN | 2  | 0.620 | -0.279 | 0.566 | -0.422 | 0.464 | 0.717  | 1.031 |
| LMNA_HUMAN  | 2  | 0.619 | 0.262  | 0.131 | -0.701 | 0.152 | 0.454  | 0.020 |
| PNPH_HUMAN  | 10 | 0.618 | -0.374 | 0.249 | 0.698  | 0.326 | -0.372 | 0.452 |
| CPNE1_HUMAN | 2  | 0.617 | -0.044 | 0.345 | -0.586 | 0.153 | 0.646  | 0.497 |
| COPG_HUMAN  | 2  | 0.617 | -0.638 | 0.341 | 0.062  | 0.029 | 0.592  | 0.312 |
| MESD2_HUMAN | 2  | 0.616 | 0.553  | 0.469 | 0.123  | 0.251 | -0.661 | 0.720 |
| SFRS3_HUMAN | 2  | 0.616 | 0.561  | 0.306 | 0.110  | 0.230 | -0.656 | 0.536 |
| PERE_HUMAN  | 18 | 0.612 | 0.501  | 0.479 | -0.679 | 0.703 | 0.194  | 0.685 |
| PSMF1_HUMAN | 2  | 0.607 | 0.064  | 0.256 | 0.580  | 0.736 | -0.629 | 0.992 |
| HP1B3_HUMAN | 3  | 0.605 | -0.228 | 0.195 | 0.692  | 1.294 | -0.449 | 1.481 |
| LEG3_HUMAN  | 3  | 0.601 | -0.063 | 0.248 | 0.638  | 0.464 | -0.559 | 0.490 |
| TYPH_HUMAN  | 3  | 0.601 | 0.103  | 0.126 | -0.639 | 0.504 | 0.551  | 0.623 |
| TGON2_HUMAN | 2  | 0.595 | 0.367  | 0.159 | 0.330  | 0.226 | -0.681 | 0.385 |
| HNRL1_HUMAN | 3  | 0.588 | -0.001 | 0.379 | -0.580 | 0.773 | 0.596  | 0.742 |
| RAB1B_HUMAN | 3  | 0.586 | -0.082 | 0.301 | 0.630  | 0.400 | -0.533 | 0.612 |
| PI42A_HUMAN | 3  | 0.573 | 0.621  | 0.794 | -0.093 | 0.360 | -0.513 | 0.995 |
| FPP5_HUMAN  | 2  | 0.573 | 0.666  | 0.189 | -0.311 | 0.584 | -0.340 | 0.396 |
| KCY_HUMAN   | 2  | 0.573 | 0.023  | 0.196 | -0.576 | 0.875 | 0.569  | 0.678 |
| HNRL2_HUMAN | 3  | 0.562 | 0.623  | 0.302 | -0.474 | 0.153 | -0.133 | 0.149 |
| SMC1A_HUMAN | 3  | 0.556 | -0.066 | 0.185 | 0.593  | 0.647 | -0.512 | 0.611 |
| RS14_HUMAN  | 4  | 0.555 | -0.429 | 0.600 | -0.095 | 0.117 | 0.655  | 0.553 |
| RLA1_HUMAN  | 3  | 0.555 | 0.075  | 0.258 | 0.522  | 0.904 | -0.581 | 1.158 |
| QPCT_HUMAN  | 2  | 0.554 | -0.630 | 0.021 | 0.396  | 0.651 | 0.249  | 0.630 |
| ICAM3_HUMAN | 2  | 0.548 | 0.294  | 0.198 | 0.347  | 0.375 | -0.626 | 0.573 |
| TMEDA_HUMAN | 3  | 0.545 | 0.178  | 0.941 | -0.605 | 0.939 | 0.443  | 0.796 |
| SAE2_HUMAN  | 2  | 0.545 | 0.226  | 0.162 | -0.616 | 0.360 | 0.405  | 0.198 |
| GRHPR_HUMAN | 4  | 0.541 | 0.143  | 0.367 | -0.592 | 0.120 | 0.464  | 0.442 |
| CATD_HUMAN  | 2  | 0.541 | 0.049  | 0.147 | -0.556 | 0.132 | 0.523  | 0.015 |
| SIAS_HUMAN  | 4  | 0.539 | 0.211  | 0.105 | 0.468  | 0.637 | -0.567 | 0.756 |
| PSA7_HUMAN  | 2  | 0.538 | 0.259  | 0.188 | 0.369  | 0.913 | -0.613 | 1.101 |
| HCK_HUMAN   | 3  | 0.538 | 0.127  | 0.272 | -0.583 | 0.368 | 0.472  | 0.501 |
| STRN_HUMAN  | 2  | 0.536 | 0.616  | 0.581 | -0.217 | 0.479 | -0.384 | 0.102 |
| UBCP1_HUMAN | 3  | 0.526 | -0.134 | 0.577 | -0.437 | 0.382 | 0.587  | 0.433 |
| RPB2_HUMAN  | 2  | 0.525 | -0.009 | 0.160 | -0.513 | 0.533 | 0.538  | 0.693 |
| TNIP2_HUMAN | 2  | 0.525 | 0.540  | 0.035 | -0.509 | 0.169 | -0.016 | 0.134 |
| SF3A2_HUMAN | 3  | 0.521 | 0.529  | 0.536 | -0.001 | 0.220 | -0.513 | 0.746 |
| PARP1_HUMAN | 5  | 0.520 | 0.268  | 0.168 | -0.645 | 0.036 | 0.244  | 0.354 |
| PHB_HUMAN   | 2  | 0.520 | 0.060  | 0.116 | -0.540 | 0.688 | 0.495  | 0.804 |
| EZRI_HUMAN  | 5  | 0.518 | -0.256 | 0.445 | -0.468 | 0.293 | 0.517  | 0.923 |
| TPP2_HUMAN  | 2  | 0.515 | 0.294  | 0.107 | 0.311  | 0.306 | -0.590 | 0.413 |
| LEG1_HUMAN  | 10 | 0.513 | 0.475  | 0.333 | -0.543 | 0.411 | 0.083  | 0.505 |
| S10A9_HUMAN | 30 | 0.508 | 0.038  | 0.355 | 0.518  | 0.774 | -0.498 | 0.601 |
| PLEK_HUMAN  | 10 | 0.507 | -0.382 | 0.190 | 0.589  | 0.503 | -0.151 | 0.104 |
| ICEF1_HUMAN | 2  | 0.505 | 0.402  | 0.599 | -0.563 | 1.686 | 0.176  | 1.086 |
| TRFE_HUMAN  | 6  | 0.505 | -0.316 | 0.381 | 0.636  | 0.262 | -0.132 | 0.323 |
| ECP_HUMAN   | 8  | 0.504 | 0.210  | 0.278 | -0.534 | 0.231 | 0.426  | 0.323 |
| ACLY_HUMAN  | 6  | 0.503 | 0.595  | 0.432 | -0.170 | 0.222 | -0.354 | 0.448 |
| ACBP_HUMAN  | 3  | 0.502 | -0.005 | 0.090 | -0.452 | 0.121 | 0.550  | 0.102 |
| S10A8_HUMAN | 25 | 0.500 | -0.033 | 0.315 | 0.529  | 0.681 | -0.469 | 0.602 |
| KAPO_HUMAN  | 3  | 0.499 | -0.359 | 0.338 | -0.199 | 0.203 | 0.573  | 0.461 |
| PRDX3_HUMAN | 3  | 0.498 | -0.209 | 0.552 | 0.574  | 0.402 | -0.350 | 0.197 |
| TNAP2_HUMAN | 2  | 0.495 | -0.101 | 0.014 | 0.545  | 0.383 | -0.428 | 0.397 |
| EIF3A_HUMAN | 3  | 0.494 | 0.231  | 0.361 | -0.561 | 0.445 | 0.345  | 0.170 |
| THIM_HUMAN  | 2  | 0.491 | 0.053  | 0.352 | -0.508 | 0.478 | 0.471  | 0.830 |
| PSB1_HUMAN  | 3  | 0.488 | -0.025 | 0.137 | -0.467 | 0.309 | 0.508  | 0.194 |
| MVP_HUMAN   | 4  | 0.488 | 0.021  | 0.116 | 0.418  | 0.162 | -0.552 | 0.379 |
| FES_HUMAN   | 3  | 0.486 | 0.564  | 0.603 | -0.314 | 0.899 | -0.234 | 0.862 |
| SELH_HUMAN  | 2  | 0.485 | 0.456  | 0.202 | -0.509 | 0.052 | 0.068  | 0.254 |
| ODO1_HUMAN  | 3  | 0.483 | -0.248 | 0.453 | -0.299 | 0.365 | 0.562  | 0.814 |
| PSA6_HUMAN  | 4  | 0.483 | 0.596  | 0.158 | 0.124  | 0.476 | -0.371 | 0.429 |
| CYTB_HUMAN  | 7  | 0.479 | -0.339 | 0.066 | -0.199 | 0.706 | 0.553  | 0.684 |
| HCD2_HUMAN  | 2  | 0.478 | 0.333  | 0.224 | -0.544 | 0.633 | 0.226  | 0.857 |
| CAP7_HUMAN  | 21 | 0.477 | -0.528 | 0.606 | 0.392  | 1.060 | 0.151  | 1.198 |
| PP2BA_HUMAN | 3  | 0.477 | -0.341 | 0.234 | -0.192 | 0.485 | 0.549  | 0.411 |
| VATA_HUMAN  | 6  | 0.476 | 0.568  | 0.498 | -0.157 | 0.235 | -0.329 | 0.388 |
| OXSRI_HUMAN | 2  | 0.475 | -0.113 | 0.031 | 0.528  | 0.224 | -0.399 | 0.193 |
| KHDR1_HUMAN | 2  | 0.474 | 0.552  | 0.241 | -0.274 | 0.158 | -0.263 | 0.399 |
| XRCC1_HUMAN | 2  | 0.473 | -0.079 | 0.802 | -0.420 | 0.134 | 0.515  | 0.668 |
| LAP2A_HUMAN | 2  | 0.472 | 0.003  | 0.034 | 0.478  | 0.825 | -0.465 | 0.859 |
| PNCB_HUMAN  | 3  | 0.471 | 0.095  | 0.472 | -0.504 | 0.172 | 0.425  | 0.340 |
| FCL_HUMAN   | 2  | 0.470 | -0.263 | 0.104 | -0.269 | 0.797 | 0.548  | 0.901 |
| SEPT6_HUMAN | 5  | 0.469 | 0.266  | 0.124 | -0.463 | 0.224 | 0.413  | 0.103 |
| TAP1_HUMAN  | 2  | 0.468 | -0.342 | 0.263 | -0.179 | 0.386 | 0.537  | 0.649 |
| G6PE_HUMAN  | 3  | 0.466 | -0.515 | 0.378 | 0.145  | 0.491 | 0.386  | 0.652 |
| DHB12_HUMAN | 3  | 0.464 | 0.076  | 0.480 | 0.430  | 0.848 | -0.490 | 0.414 |
| PTN11_HUMAN | 2  | 0.463 | -0.491 | 0.141 | 0.081  | 0.222 | 0.425  | 0.081 |
| SYDC_HUMAN  | 3  | 0.461 | -0.256 | 0.072 | -0.266 | 0.295 | 0.538  | 0.224 |
| CSN3_HUMAN  | 2  | 0.459 | -0.067 | 0.031 | -0.414 | 0.401 | 0.496  | 0.432 |
| PB1_HUMAN   | 2  | 0.459 | 0.535  | 0.031 | -0.271 | 0.028 | -0.248 | 0.059 |
| H4_HUMAN    | 15 | 0.453 | 0.475  | 0.553 | -0.384 | 1.114 | -0.203 | 0.691 |
| RETN_HUMAN  | 11 | 0.452 | 0.372  | 0.233 | 0.067  | 0.332 | -0.518 | 0.096 |
| BOLA2_HUMAN | 3  | 0.452 | -0.331 | 0.621 | -0.172 | 0.305 | 0.519  | 0.584 |
| LAMP1_HUMAN | 2  | 0.449 | -0.490 | 0.481 | 0.387  | 0.210 | 0.118  | 0.270 |
| GPX1_HUMAN  | 3  | 0.449 | 0.094  | 0.148 | -0.481 | 0.415 | 0.403  | 0.301 |
| AMPN_HUMAN  | 3  | 0.446 | -0.436 | 0.366 | -0.006 | 0.390 | 0.457  | 0.391 |
| CBX3_HUMAN  | 3  | 0.443 | -0.305 | 0.520 | -0.192 | 0.314 | 0.512  | 0.834 |
| PTPRJ_HUMAN | 5  | 0.442 | 0.157  | 0.517 | 0.352  | 0.314 | -0.493 | 0.216 |
| MGA_HUMAN   | 2  | 0.439 | -0.496 | 0.284 | 0.189  | 0.002 | 0.323  | 0.286 |
| UBP7_HUMAN  | 2  | 0.438 | 0.421  | 0.122 | 0.047  | 0.440 | -0.452 | 0.319 |
| CD59_HUMAN  | 2  | 0.438 | -0.006 | 0.046 | -0.427 | 0.679 | 0.449  | 0.633 |
| ADAMB_HUMAN | 2  | 0.438 | 0.481  | 0.307 | -0.085 | 0.017 | -0.381 | 0.290 |
| CALR_HUMAN  | 15 | 0.438 | -0.123 | 0.180 | 0.538  | 0.543 | -0.291 | 0.575 |
| S100P_HUMAN | 3  | 0.438 | -0.480 | 0.677 | 0.371  | 0.402 | 0.125  | 0.878 |
| CD44_HUMAN  | 2  | 0.438 | 0.339  | 0.144 | -0.490 | 0.191 | 0.167  | 0.046 |
| 41_HUMAN    | 2  | 0.437 | -0.482 | 0.034 | 0.135  | 0.155 | 0.363  | 0.189 |
| CREG1_HUMAN | 4  | 0.436 | -0.535 | 0.363 | 0.140  | 0.039 | 0.282  | 0.349 |
| QCR1_HUMAN  | 2  | 0.436 | 0.235  | 0.057 | -0.497 | 0.069 | 0.277  | 0.011 |
| SAFB1_HUMAN | 2  | 0.435 | 0.507  | 0.189 | -0.269 | 0.223 | -0.222 | 0.034 |

|             |    |       |        |       |        |       |        |       |
|-------------|----|-------|--------|-------|--------|-------|--------|-------|
| F1142_HUMAN | 2  | 0.434 | 0.499  | 0.531 | -0.311 | 0.431 | -0.173 | 0.100 |
| NASP_HUMAN  | 2  | 0.433 | 0.486  | 0.214 | -0.354 | 0.078 | -0.117 | 0.137 |
| NDKA_HUMAN  | 6  | 0.433 | -0.357 | 0.506 | 0.484  | 0.587 | -0.112 | 0.571 |
| FLNB_HUMAN  | 2  | 0.430 | 0.471  | 0.630 | -0.078 | 0.026 | -0.377 | 0.603 |
| MEFV_HUMAN  | 2  | 0.427 | 0.429  | 0.001 | -0.425 | 0.048 | 0.011  | 0.047 |
| EIF3C_HUMAN | 2  | 0.425 | 0.429  | 0.601 | 0.007  | 0.494 | -0.421 | 0.107 |
| VINC_HUMAN  | 26 | 0.424 | -0.169 | 0.263 | 0.502  | 0.343 | -0.283 | 0.509 |
| TCPB_HUMAN  | 7  | 0.423 | 0.116  | 0.484 | 0.362  | 0.339 | -0.463 | 0.753 |
| NIT2_HUMAN  | 3  | 0.423 | -0.482 | 0.264 | 0.283  | 0.326 | 0.214  | 0.563 |
| PP2AA_HUMAN | 3  | 0.417 | -0.257 | 0.537 | 0.486  | 0.551 | -0.213 | 0.363 |
| MMP8_HUMAN  | 15 | 0.414 | -0.289 | 0.281 | 0.461  | 0.797 | -0.219 | 0.631 |
| PSMD6_HUMAN | 3  | 0.414 | -0.249 | 0.504 | -0.218 | 0.286 | 0.483  | 0.493 |
| TCPG_HUMAN  | 2  | 0.413 | -0.205 | 0.294 | -0.260 | 0.524 | 0.481  | 0.818 |
| AIF1_HUMAN  | 3  | 0.413 | -0.331 | 0.170 | -0.119 | 0.238 | 0.466  | 0.398 |
| DCTN2_HUMAN | 2  | 0.412 | 0.410  | 1.071 | 0.020  | 1.191 | -0.414 | 0.120 |
| PSA5_HUMAN  | 4  | 0.411 | -0.125 | 0.241 | -0.326 | 0.196 | 0.466  | 0.419 |
| CISY_HUMAN  | 5  | 0.411 | 0.293  | 0.086 | -0.462 | 0.128 | 0.197  | 0.448 |
| PLEC1_HUMAN | 22 | 0.411 | 0.420  | 0.161 | -0.398 | 0.200 | -0.053 | 0.213 |
| RCC2_HUMAN  | 3  | 0.410 | 0.090  | 0.234 | -0.386 | 0.087 | 0.430  | 0.330 |
| PADI2_HUMAN | 13 | 0.408 | -0.402 | 0.313 | 0.413  | 0.271 | 0.004  | 0.319 |
| SYYC_HUMAN  | 2  | 0.407 | 0.207  | 0.322 | 0.271  | 0.583 | -0.463 | 0.906 |
| ACTB_HUMAN  | 2  | 0.406 | -0.358 | 0.068 | 0.444  | 0.575 | -0.070 | 0.507 |
| PRG3_HUMAN  | 9  | 0.405 | 0.305  | 0.634 | -0.490 | 0.152 | -0.227 | 0.684 |
| CTBP1_HUMAN | 3  | 0.403 | 0.439  | 0.831 | -0.357 | 0.683 | -0.067 | 0.245 |
| ARL8B_HUMAN | 2  | 0.401 | -0.168 | 0.067 | 0.463  | 0.255 | -0.279 | 0.322 |
| GRK6_HUMAN  | 2  | 0.400 | 0.294  | 0.058 | 0.174  | 0.094 | -0.452 | 0.153 |
| ACS11_HUMAN | 2  | 0.400 | 0.264  | 0.177 | -0.456 | 0.391 | 0.207  | 0.214 |
| RAB7A_HUMAN | 7  | 0.399 | 0.419  | 0.378 | -0.081 | 0.338 | -0.370 | 0.599 |
| FLOT2_HUMAN | 6  | 0.399 | -0.251 | 0.400 | 0.416  | 0.208 | -0.297 | 0.200 |
| MK01_HUMAN  | 2  | 0.398 | -0.181 | 0.165 | -0.266 | 0.406 | 0.462  | 0.241 |
| ACINU_HUMAN | 3  | 0.397 | 0.339  | 0.184 | -0.434 | 0.374 | 0.110  | 0.471 |
| HMG1_HUMAN  | 4  | 0.397 | -0.372 | 0.442 | -0.228 | 0.334 | 0.376  | 0.290 |
| TPM3_HUMAN  | 3  | 0.396 | 0.377  | 0.654 | 0.051  | 0.252 | -0.412 | 0.441 |
| RS11_HUMAN  | 2  | 0.396 | 0.157  | 0.378 | 0.302  | 1.206 | -0.444 | 0.828 |
| CC88B_HUMAN | 6  | 0.395 | 0.274  | 0.249 | -0.460 | 0.027 | 0.161  | 0.139 |
| PREX1_HUMAN | 5  | 0.394 | -0.392 | 0.111 | 0.305  | 0.200 | 0.276  | 0.141 |
| THIC_HUMAN  | 3  | 0.393 | 0.395  | 0.344 | -0.390 | 0.207 | 0.010  | 0.160 |
| CS043_HUMAN | 2  | 0.392 | 0.180  | 0.168 | -0.444 | 0.094 | 0.279  | 0.074 |
| PRAM_HUMAN  | 10 | 0.389 | -0.403 | 0.103 | -0.035 | 0.198 | 0.375  | 0.158 |
| IDHP_HUMAN  | 4  | 0.388 | 0.331  | 0.093 | 0.078  | 0.041 | -0.431 | 0.025 |
| GRAN_HUMAN  | 9  | 0.388 | 0.210  | 0.323 | 0.344  | 0.411 | -0.385 | 0.580 |
| ANXA7_HUMAN | 4  | 0.388 | 0.443  | 0.150 | -0.274 | 0.499 | 0.341  | 0.375 |
| GRN_HUMAN   | 12 | 0.387 | -0.457 | 0.309 | 0.115  | 0.297 | 0.281  | 0.406 |
| PML_HUMAN   | 3  | 0.386 | 0.103  | 0.202 | -0.420 | 0.052 | 0.332  | 0.171 |
| RAB5C_HUMAN | 3  | 0.384 | -0.395 | 0.857 | 0.371  | 0.489 | 0.039  | 0.496 |
| HNRPR_HUMAN | 2  | 0.383 | 0.156  | 0.055 | 0.290  | 0.237 | -0.430 | 0.291 |
| RPN1_HUMAN  | 6  | 0.380 | 0.126  | 0.212 | 0.382  | 0.268 | -0.366 | 0.238 |
| RL23A_HUMAN | 2  | 0.380 | -0.309 | 0.460 | -0.103 | 0.068 | 0.427  | 0.528 |
| RB27A_HUMAN | 7  | 0.378 | 0.064  | 0.395 | 0.100  | 0.031 | -0.573 | 0.089 |
| BAX_HUMAN   | 3  | 0.377 | 0.140  | 0.415 | 0.297  | 0.221 | -0.421 | 0.603 |
| ABCF1_HUMAN | 2  | 0.376 | 0.412  | 0.878 | -0.067 | 0.321 | -0.330 | 1.199 |
| RPN2_HUMAN  | 3  | 0.376 | 0.287  | 0.583 | 0.150  | 0.491 | -0.421 | 0.639 |
| TLN1_HUMAN  | 74 | 0.373 | -0.236 | 0.289 | 0.436  | 0.278 | -0.181 | 0.384 |
| NCF1B_HUMAN | 8  | 0.373 | 0.160  | 0.188 | -0.455 | 0.036 | 0.218  | 0.135 |
| MAP4_HUMAN  | 2  | 0.372 | 0.435  | 0.031 | -0.206 | 0.004 | -0.214 | 0.027 |
| DHR57_HUMAN | 3  | 0.370 | -0.348 | 0.330 | -0.027 | 0.146 | 0.390  | 0.390 |
| SFRS7_HUMAN | 2  | 0.369 | 0.322  | 0.081 | -0.400 | 0.649 | 0.094  | 0.730 |
| RL6_HUMAN   | 3  | 0.368 | 0.114  | 0.157 | -0.405 | 0.352 | 0.306  | 0.504 |
| PEBP1_HUMAN | 6  | 0.367 | -0.160 | 0.354 | -0.271 | 0.031 | 0.412  | 0.426 |
| NDRG1_HUMAN | 2  | 0.365 | -0.360 | 0.018 | 0.007  | 0.164 | 0.369  | 0.182 |
| HBXIP_HUMAN | 2  | 0.364 | 0.338  | 0.139 | -0.384 | 0.557 | 0.062  | 0.418 |
| DNJA1_HUMAN | 3  | 0.364 | 0.032  | 0.430 | 0.355  | 0.122 | -0.371 | 0.339 |
| CATC_HUMAN  | 5  | 0.362 | 0.082  | 0.095 | 0.295  | 0.285 | -0.411 | 0.302 |
| U2AF1_HUMAN | 3  | 0.361 | 0.402  | 0.174 | -0.304 | 0.391 | -0.082 | 0.462 |
| UTRO_HUMAN  | 2  | 0.361 | 0.067  | 0.189 | 0.331  | 0.032 | -0.382 | 0.221 |
| CNDP2_HUMAN | 3  | 0.360 | -0.078 | 0.447 | -0.307 | 0.619 | 0.400  | 0.494 |
| SC23A_HUMAN | 5  | 0.360 | -0.301 | 0.902 | 0.419  | 0.834 | 0.075  | 0.103 |
| ROAA_HUMAN  | 2  | 0.357 | 0.307  | 0.229 | -0.389 | 0.131 | 0.098  | 0.360 |
| GPR97_HUMAN | 2  | 0.357 | 0.279  | 0.363 | -0.398 | 0.195 | 0.135  | 0.169 |
| DEF1_HUMAN  | 12 | 0.353 | -0.182 | 0.656 | -0.214 | 2.060 | 0.412  | 1.654 |
| NUP98_HUMAN | 2  | 0.353 | -0.381 | 0.062 | 0.087  | 0.522 | 0.309  | 0.460 |
| PHP14_HUMAN | 4  | 0.352 | 0.232  | 0.305 | -0.469 | 0.585 | -0.064 | 0.333 |
| COX5A_HUMAN | 2  | 0.351 | -0.184 | 0.346 | 0.411  | 0.289 | -0.212 | 0.057 |
| KCAB2_HUMAN | 3  | 0.351 | -0.291 | 0.249 | -0.087 | 0.713 | 0.393  | 0.850 |
| LIRB2_HUMAN | 2  | 0.350 | -0.178 | 0.002 | 0.409  | 0.069 | -0.216 | 0.071 |
| SH3L1_HUMAN | 9  | 0.350 | -0.032 | 0.337 | -0.325 | 0.383 | 0.372  | 0.455 |
| TCPE_HUMAN  | 4  | 0.350 | 0.069  | 0.032 | -0.293 | 0.382 | 0.406  | 0.221 |
| GLU2B_HUMAN | 7  | 0.349 | 0.201  | 0.144 | 0.265  | 0.361 | -0.370 | 0.352 |
| HNRDL_HUMAN | 2  | 0.349 | -0.171 | 0.241 | -0.221 | 0.233 | 0.408  | 0.474 |
| B2MG_HUMAN  | 7  | 0.347 | 0.091  | 0.218 | 0.301  | 0.482 | -0.377 | 0.350 |
| PRG2_HUMAN  | 14 | 0.347 | 0.303  | 0.378 | -0.390 | 0.880 | -0.024 | 0.530 |
| ICB1_HUMAN  | 3  | 0.344 | -0.090 | 0.068 | -0.281 | 0.280 | 0.387  | 0.341 |
| TOR1A_HUMAN | 2  | 0.343 | 0.024  | 0.215 | -0.347 | 0.228 | 0.338  | 0.443 |
| IMDH1_HUMAN | 3  | 0.343 | 0.136  | 0.071 | 0.263  | 0.413 | -0.384 | 0.343 |
| TXND4_HUMAN | 2  | 0.343 | 0.247  | 0.236 | 0.156  | 0.071 | -0.387 | 0.307 |
| HUWE1_HUMAN | 3  | 0.342 | 0.371  | 0.360 | -0.048 | 0.098 | -0.307 | 0.362 |
| TKT_HUMAN   | 39 | 0.342 | 0.363  | 0.334 | -0.321 | 0.272 | 0.015  | 0.188 |
| RINI_HUMAN  | 21 | 0.342 | 0.201  | 0.323 | -0.389 | 0.492 | 0.204  | 0.557 |
| DYL2_HUMAN  | 3  | 0.341 | -0.343 | 0.154 | 0.339  | 0.627 | 0.019  | 0.694 |
| PSB2_HUMAN  | 2  | 0.338 | 0.153  | 0.410 | 0.244  | 0.339 | -0.381 | 0.749 |
| PSME2_HUMAN | 5  | 0.336 | 0.266  | 0.318 | -0.394 | 0.426 | 0.046  | 0.528 |
| PTMA_HUMAN  | 2  | 0.336 | 0.246  | 0.314 | 0.148  | 0.252 | -0.378 | 0.566 |
| RS13_HUMAN  | 2  | 0.336 | 0.118  | 0.033 | -0.372 | 0.617 | 0.270  | 0.650 |
| PTBP1_HUMAN | 3  | 0.336 | -0.024 | 0.225 | -0.108 | 0.247 | 0.511  | 0.285 |
| PPM1F_HUMAN | 2  | 0.335 | -0.301 | 0.006 | -0.046 | 0.088 | 0.363  | 0.082 |
| LAGE3_HUMAN | 2  | 0.335 | 0.192  | 0.130 | -0.381 | 0.172 | 0.205  | 0.041 |
| OTUB1_HUMAN | 3  | 0.334 | 0.391  | 0.373 | -0.175 | 0.320 | -0.201 | 0.400 |
| STT3B_HUMAN | 2  | 0.334 | -0.249 | 0.122 | 0.384  | 0.276 | -0.119 | 0.153 |



|             |    |       |        |       |        |       |        |       |
|-------------|----|-------|--------|-------|--------|-------|--------|-------|
| KPCB_HUMAN  | 5  | 0.334 | 0.330  | 0.262 | -0.337 | 0.173 | 0.022  | 0.361 |
| ABI1_HUMAN  | 2  | 0.334 | -0.041 | 0.702 | -0.303 | 0.209 | 0.359  | 0.911 |
| OXR1_HUMAN  | 2  | 0.333 | 0.005  | 0.175 | -0.342 | 0.104 | 0.323  | 0.279 |
| COASY_HUMAN | 2  | 0.333 | -0.044 | 0.109 | -0.301 | 0.305 | 0.360  | 0.196 |
| HNRPC_HUMAN | 5  | 0.333 | 0.175  | 0.218 | -0.123 | 0.315 | -0.490 | 0.142 |
| RCC1_HUMAN  | 3  | 0.333 | 0.193  | 0.379 | -0.379 | 0.291 | 0.201  | 0.139 |
| TTL12_HUMAN | 3  | 0.332 | 0.304  | 0.163 | -0.353 | 0.215 | 0.064  | 0.082 |
| DEF16_HUMAN | 4  | 0.332 | -0.158 | 0.111 | -0.214 | 0.635 | 0.387  | 0.687 |
| BST1_HUMAN  | 6  | 0.331 | 0.408  | 0.347 | -0.251 | 0.012 | 0.024  | 0.427 |
| IF4A3_HUMAN | 2  | 0.331 | 0.106  | 0.390 | 0.273  | 0.072 | -0.364 | 0.318 |
| ILF3_HUMAN  | 8  | 0.327 | -0.086 | 0.238 | -0.210 | 0.028 | 0.408  | 0.201 |
| CDC42_HUMAN | 4  | 0.327 | -0.347 | 0.177 | 0.166  | 0.070 | 0.261  | 0.082 |
| RAP1B_HUMAN | 7  | 0.327 | -0.147 | 0.197 | 0.380  | 0.249 | -0.218 | 0.432 |
| UN13D_HUMAN | 7  | 0.325 | -0.300 | 0.253 | 0.093  | 0.230 | 0.345  | 0.143 |
| TNPO1_HUMAN | 2  | 0.325 | 0.304  | 0.022 | 0.052  | 0.267 | -0.340 | 0.289 |
| IF2GL_HUMAN | 2  | 0.324 | 0.362  | 0.390 | -0.272 | 0.376 | -0.075 | 0.014 |
| HNRPG_HUMAN | 4  | 0.324 | 0.416  | 0.336 | -0.195 | 0.046 | -0.072 | 0.239 |
| PPM1A_HUMAN | 2  | 0.323 | -0.310 | 0.096 | 0.334  | 0.274 | -0.008 | 0.177 |
| CDD_HUMAN   | 6  | 0.322 | 0.267  | 0.626 | -0.355 | 0.150 | 0.103  | 0.656 |
| VAMP8_HUMAN | 3  | 0.322 | -0.165 | 0.071 | 0.377  | 0.046 | -0.196 | 0.028 |
| NOL5A_HUMAN | 2  | 0.321 | -0.005 | 0.387 | -0.311 | 0.893 | 0.331  | 0.506 |
| MMP9_HUMAN  | 46 | 0.321 | -0.036 | 0.282 | -0.345 | 0.461 | 0.296  | 0.451 |
| TAOK3_HUMAN | 3  | 0.320 | 0.263  | 0.082 | -0.353 | 0.779 | 0.106  | 0.702 |
| HKK2_HUMAN  | 2  | 0.319 | 0.285  | 0.099 | 0.073  | 0.460 | -0.342 | 0.361 |
| NSUN2_HUMAN | 2  | 0.319 | 0.182  | 0.380 | -0.363 | 0.143 | 0.196  | 0.237 |
| ANXA6_HUMAN | 31 | 0.319 | 0.011  | 0.240 | -0.316 | 0.207 | 0.321  | 0.416 |
| CY24A_HUMAN | 2  | 0.318 | -0.038 | 0.044 | 0.343  | 0.232 | -0.290 | 0.187 |
| NEDD8_HUMAN | 2  | 0.318 | 0.368  | 0.179 | -0.127 | 0.164 | -0.226 | 0.342 |
| CATG_HUMAN  | 17 | 0.318 | -0.348 | 0.250 | 0.025  | 0.194 | 0.284  | 0.216 |
| FGD3_HUMAN  | 3  | 0.317 | 0.077  | 0.513 | 0.281  | 0.106 | -0.342 | 0.477 |
| CSRP1_HUMAN | 5  | 0.317 | -0.057 | 0.462 | 0.349  | 0.527 | -0.277 | 0.382 |
| GNAI3_HUMAN | 2  | 0.317 | -0.319 | 0.074 | 0.315  | 0.215 | 0.019  | 0.288 |
| TPR_HUMAN   | 2  | 0.317 | 0.322  | 0.394 | -0.312 | 0.044 | 0.006  | 0.438 |
| CAZ2A_HUMAN | 3  | 0.316 | 0.269  | 0.448 | 0.092  | 0.213 | -0.345 | 0.249 |
| PCP_HUMAN   | 3  | 0.316 | -0.335 | 0.218 | 0.061  | 0.456 | 0.290  | 0.648 |
| CASP1_HUMAN | 2  | 0.316 | -0.088 | 0.077 | -0.253 | 0.206 | 0.357  | 0.284 |
| VAPB_HUMAN  | 2  | 0.316 | -0.173 | 0.110 | 0.370  | 0.060 | -0.181 | 0.169 |
| MA2B1_HUMAN | 3  | 0.315 | -0.355 | 0.242 | 0.144  | 0.400 | 0.227  | 0.466 |
| PSD12_HUMAN | 2  | 0.314 | 0.345  | 0.047 | -0.273 | 0.192 | -0.057 | 0.145 |
| CAMP_HUMAN  | 10 | 0.314 | -0.351 | 0.121 | 0.250  | 0.270 | 0.106  | 0.231 |
| UBR4_HUMAN  | 4  | 0.313 | 0.305  | 0.330 | -0.053 | 0.183 | -0.319 | 0.167 |
| GDF7_HUMAN  | 2  | 0.313 | -0.341 | 0.567 | 0.268  | 0.394 | 0.088  | 0.173 |
| LMAN2_HUMAN | 5  | 0.313 | 0.187  | 0.061 | 0.321  | 0.073 | -0.276 | 0.291 |
| MP2K2_HUMAN | 3  | 0.312 | 0.325  | 0.623 | -0.009 | 0.167 | -0.300 | 0.637 |
| PRP8_HUMAN  | 3  | 0.312 | 0.060  | 0.072 | -0.331 | 0.167 | 0.287  | 0.221 |
| PERF_HUMAN  | 2  | 0.312 | 0.037  | 0.443 | 0.300  | 0.338 | -0.321 | 0.105 |
| GGH_HUMAN   | 2  | 0.312 | -0.016 | 0.344 | 0.327  | 0.046 | -0.296 | 0.298 |
| HNRH1_HUMAN | 9  | 0.312 | 0.216  | 0.046 | -0.011 | 0.491 | -0.401 | 0.428 |
| PDCD4_HUMAN | 2  | 0.312 | 0.219  | 0.460 | 0.149  | 0.568 | -0.353 | 0.108 |
| CAND1_HUMAN | 3  | 0.310 | 0.312  | 0.189 | 0.013  | 0.160 | -0.309 | 0.215 |
| COTL1_HUMAN | 8  | 0.309 | 0.374  | 0.260 | -0.089 | 0.508 | -0.213 | 0.412 |
| ANXA5_HUMAN | 8  | 0.309 | 0.151  | 0.163 | -0.381 | 0.409 | 0.157  | 0.192 |
| CX6B1_HUMAN | 3  | 0.308 | -0.236 | 0.323 | -0.101 | 0.721 | 0.352  | 0.573 |
| 1A30_HUMAN  | 3  | 0.307 | -0.217 | 0.919 | 0.356  | 0.910 | -0.123 | 0.794 |
| YBOX1_HUMAN | 3  | 0.307 | 0.345  | 0.044 | -0.268 | 0.141 | 0.031  | 0.157 |
| GPSN2_HUMAN | 2  | 0.306 | -0.119 | 0.267 | 0.354  | 0.101 | -0.220 | 0.367 |
| K6PL_HUMAN  | 9  | 0.306 | -0.342 | 0.424 | -0.214 | 0.272 | 0.240  | 0.414 |
| VPS29_HUMAN | 2  | 0.305 | 0.154  | 0.460 | 0.208  | 0.157 | -0.346 | 0.617 |
| RHG01_HUMAN | 7  | 0.304 | 0.006  | 0.225 | 0.386  | 0.368 | -0.216 | 0.350 |
| PREP_HUMAN  | 2  | 0.304 | -0.339 | 0.168 | 0.236  | 0.018 | 0.119  | 0.151 |
| THOC4_HUMAN | 3  | 0.304 | 0.048  | 0.064 | -0.318 | 0.781 | 0.286  | 0.796 |
| ADT2_HUMAN  | 2  | 0.303 | 0.246  | 0.124 | 0.104  | 0.035 | -0.335 | 0.159 |
| PARK7_HUMAN | 12 | 0.302 | 0.052  | 0.279 | -0.244 | 0.464 | 0.361  | 0.641 |
| CH3L1_HUMAN | 5  | 0.302 | -0.063 | 0.252 | 0.328  | 0.009 | -0.266 | 0.056 |
| STK4_HUMAN  | 8  | 0.301 | -0.225 | 0.356 | -0.213 | 0.409 | 0.302  | 0.355 |
| LDHA_HUMAN  | 20 | 0.300 | -0.378 | 0.327 | 0.182  | 0.437 | 0.090  | 0.447 |
| RD23B_HUMAN | 3  | 0.300 | 0.273  | 0.007 | 0.076  | 0.099 | -0.317 | 0.077 |
| PRS4_HUMAN  | 3  | 0.299 | 0.064  | 0.390 | 0.271  | 0.332 | -0.319 | 0.540 |
| TCPA_HUMAN  | 6  | 0.299 | 0.221  | 0.290 | 0.093  | 0.076 | -0.349 | 0.432 |
| MATR3_HUMAN | 4  | 0.298 | 0.127  | 0.196 | -0.335 | 0.363 | 0.223  | 0.207 |
| EWS_HUMAN   | 3  | 0.297 | 0.307  | 0.064 | -0.005 | 0.035 | -0.287 | 0.087 |
| RN213_HUMAN | 2  | 0.297 | 0.348  | 0.120 | -0.159 | 0.081 | -0.174 | 0.039 |
| AL3B1_HUMAN | 2  | 0.296 | -0.138 | 0.164 | -0.192 | 0.207 | 0.346  | 0.043 |
| RL17_HUMAN  | 2  | 0.296 | 0.049  | 0.004 | 0.277  | 0.651 | -0.310 | 0.647 |
| CEAM8_HUMAN | 3  | 0.295 | -0.043 | 0.493 | -0.263 | 0.961 | 0.322  | 0.523 |
| CATZ_HUMAN  | 3  | 0.295 | -0.220 | 0.368 | -0.104 | 0.099 | 0.340  | 0.467 |
| PSMD1_HUMAN | 3  | 0.295 | 0.324  | 0.252 | -0.259 | 0.075 | -0.049 | 0.308 |
| LYN_HUMAN   | 4  | 0.295 | 0.075  | 0.109 | 0.259  | 0.255 | -0.318 | 0.281 |
| LC7L2_HUMAN | 3  | 0.294 | 0.299  | 0.312 | -0.289 | 0.472 | 0.006  | 0.182 |
| ARRB2_HUMAN | 3  | 0.294 | -0.084 | 0.087 | 0.288  | 0.146 | -0.292 | 0.330 |
| 1433T_HUMAN | 5  | 0.294 | 0.206  | 0.121 | 0.252  | 0.399 | -0.278 | 0.251 |
| UBA1_HUMAN  | 18 | 0.293 | 0.053  | 0.211 | 0.257  | 0.286 | -0.321 | 0.348 |
| GBLP_HUMAN  | 4  | 0.293 | -0.227 | 0.110 | -0.206 | 0.074 | 0.291  | 0.290 |
| ELNE_HUMAN  | 42 | 0.293 | -0.104 | 0.389 | -0.203 | 0.524 | 0.346  | 0.314 |
| QSOX1_HUMAN | 3  | 0.293 | -0.034 | 0.142 | -0.341 | 0.175 | 0.244  | 0.290 |
| GLRX1_HUMAN | 5  | 0.292 | -0.171 | 0.506 | -0.156 | 0.198 | 0.342  | 0.379 |
| RIN3_HUMAN  | 2  | 0.292 | 0.265  | 0.569 | -0.311 | 0.574 | 0.062  | 0.005 |
| PHB2_HUMAN  | 4  | 0.291 | 0.369  | 0.076 | -0.173 | 0.430 | -0.089 | 0.510 |
| F10A1_HUMAN | 3  | 0.290 | -0.133 | 0.187 | 0.338  | 0.129 | -0.190 | 0.288 |
| RAB24_HUMAN | 2  | 0.289 | -0.194 | 0.839 | -0.127 | 0.018 | 0.337  | 0.857 |
| RHG30_HUMAN | 3  | 0.289 | 0.322  | 0.103 | -0.244 | 0.340 | -0.062 | 0.240 |
| FAS_HUMAN   | 3  | 0.289 | 0.214  | 0.108 | 0.125  | 0.104 | -0.324 | 0.027 |
| ROD1_HUMAN  | 2  | 0.288 | 0.177  | 0.740 | -0.327 | 0.820 | 0.166  | 0.080 |
| CAH2_HUMAN  | 2  | 0.288 | 0.330  | 0.388 | -0.096 | 0.074 | -0.218 | 0.314 |
| AB1IP_HUMAN | 5  | 0.287 | 0.263  | 0.365 | 0.056  | 0.402 | -0.304 | 0.348 |
| CSN2_HUMAN  | 3  | 0.287 | -0.312 | 0.105 | 0.247  | 0.344 | 0.080  | 0.341 |
| GNS_HUMAN   | 2  | 0.286 | -0.322 | 0.143 | 0.213  | 0.134 | 0.124  | 0.009 |
| TIF1B_HUMAN | 3  | 0.286 | 0.213  | 0.185 | -0.321 | 0.228 | 0.124  | 0.095 |

|             |    |       |        |       |        |       |        |       |
|-------------|----|-------|--------|-------|--------|-------|--------|-------|
| TOIP1_HUMAN | 4  | 0.286 | 0.303  | 0.191 | -0.094 | 0.723 | -0.252 | 0.114 |
| HEM2_HUMAN  | 2  | 0.285 | 0.261  | 0.356 | -0.302 | 0.219 | 0.057  | 0.137 |
| RBP2_HUMAN  | 3  | 0.285 | 0.200  | 0.251 | 0.137  | 0.505 | -0.322 | 0.618 |
| SYWC_HUMAN  | 6  | 0.285 | 0.110  | 0.215 | 0.152  | 0.130 | -0.361 | 0.135 |
| ARG1_HUMAN  | 4  | 0.285 | -0.213 | 0.220 | 0.028  | 0.023 | 0.354  | 0.090 |
| NUPL_HUMAN  | 2  | 0.283 | 0.323  | 0.068 | -0.220 | 0.376 | -0.088 | 0.308 |
| GRP75_HUMAN | 4  | 0.280 | 0.326  | 0.290 | -0.118 | 0.138 | -0.192 | 0.399 |
| PTN1_HUMAN  | 2  | 0.279 | -0.032 | 0.376 | -0.254 | 0.640 | 0.301  | 0.264 |
| COPA_HUMAN  | 2  | 0.279 | -0.166 | 0.178 | 0.327  | 0.184 | -0.146 | 0.362 |
| DNJC8_HUMAN | 2  | 0.279 | 0.253  | 0.264 | 0.059  | 0.700 | -0.296 | 0.964 |
| URP2_HUMAN  | 20 | 0.278 | -0.101 | 0.355 | 0.288  | 0.340 | -0.251 | 0.417 |
| GDS1_HUMAN  | 2  | 0.278 | 0.215  | 0.265 | 0.111  | 0.011 | -0.310 | 0.255 |
| COPB_HUMAN  | 5  | 0.277 | -0.313 | 0.172 | 0.137  | 0.324 | 0.192  | 0.289 |
| PLCG2_HUMAN | 4  | 0.277 | -0.079 | 0.185 | 0.255  | 0.175 | -0.295 | 0.100 |
| STXB2_HUMAN | 5  | 0.276 | 0.028  | 0.169 | 0.219  | 0.097 | -0.324 | 0.045 |
| SAR1A_HUMAN | 4  | 0.275 | -0.107 | 0.182 | 0.319  | 0.189 | -0.196 | 0.134 |
| RAB8A_HUMAN | 9  | 0.275 | -0.188 | 0.152 | 0.320  | 0.478 | -0.117 | 0.507 |
| MSRA_HUMAN  | 5  | 0.274 | -0.018 | 0.372 | -0.219 | 0.056 | 0.324  | 0.058 |
| FLOT1_HUMAN | 8  | 0.274 | 0.046  | 0.245 | 0.256  | 0.287 | -0.287 | 0.332 |
| PDXD1_HUMAN | 2  | 0.273 | 0.316  | 0.099 | -0.195 | 0.160 | -0.106 | 0.259 |
| ANK1_HUMAN  | 2  | 0.272 | -0.271 | 0.567 | 0.014  | 0.241 | 0.273  | 0.808 |
| MP2K3_HUMAN | 2  | 0.271 | 0.198  | 0.127 | 0.122  | 0.187 | -0.305 | 0.060 |
| SART3_HUMAN | 3  | 0.271 | -0.227 | 0.265 | -0.060 | 0.088 | 0.303  | 0.252 |
| TCP2_HUMAN  | 4  | 0.271 | -0.196 | 0.046 | 0.264  | 0.129 | -0.213 | 0.082 |
| ANXA2_HUMAN | 13 | 0.270 | 0.305  | 0.218 | -0.117 | 0.242 | -0.199 | 0.235 |
| HCFC1_HUMAN | 2  | 0.269 | 0.152  | 0.068 | -0.306 | 0.294 | 0.170  | 0.227 |
| PSA4_HUMAN  | 2  | 0.268 | 0.132  | 0.230 | 0.186  | 0.469 | -0.302 | 0.239 |
| 6PGL_HUMAN  | 5  | 0.268 | 0.392  | 0.247 | -0.006 | 0.129 | -0.117 | 0.391 |
| PAIRB_HUMAN | 4  | 0.267 | -0.096 | 0.210 | -0.209 | 0.024 | 0.301  | 0.186 |
| DAZP1_HUMAN | 3  | 0.267 | 0.289  | 0.266 | -0.242 | 0.153 | -0.031 | 0.399 |
| BIN2_HUMAN  | 8  | 0.267 | -0.152 | 0.603 | 0.313  | 0.564 | -0.145 | 0.185 |
| CSN1_HUMAN  | 2  | 0.266 | 0.306  | 0.454 | -0.091 | 0.105 | -0.200 | 0.348 |
| DNJC5_HUMAN | 2  | 0.266 | -0.287 | 0.348 | 0.234  | 0.091 | 0.068  | 0.256 |
| CTO27_HUMAN | 2  | 0.265 | -0.027 | 0.129 | -0.242 | 0.164 | 0.285  | 0.035 |
| NCPR_HUMAN  | 2  | 0.265 | 0.192  | 0.393 | -0.298 | 0.456 | 0.122  | 0.063 |
| UBP47_HUMAN | 2  | 0.264 | -0.172 | 0.192 | -0.121 | 0.058 | 0.309  | 0.134 |
| PP1A_HUMAN  | 9  | 0.263 | 0.143  | 0.392 | -0.267 | 0.201 | 0.223  | 0.451 |
| 1433F_HUMAN | 7  | 0.263 | -0.298 | 0.350 | 0.151  | 0.389 | 0.162  | 0.227 |
| AL5AP_HUMAN | 5  | 0.262 | 0.028  | 0.019 | -0.206 | 0.289 | 0.316  | 0.039 |
| FKBP3_HUMAN | 2  | 0.262 | -0.297 | 0.133 | 0.148  | 0.094 | 0.164  | 0.038 |
| VAOD1_HUMAN | 3  | 0.261 | -0.225 | 0.158 | -0.048 | 0.316 | 0.289  | 0.198 |
| TR150_HUMAN | 3  | 0.261 | 0.061  | 0.234 | -0.279 | 0.102 | 0.233  | 0.302 |
| LZIC_HUMAN  | 2  | 0.260 | 0.014  | 0.198 | 0.260  | 0.302 | -0.259 | 0.103 |
| CKAP5_HUMAN | 2  | 0.259 | -0.155 | 0.209 | 0.303  | 0.342 | -0.133 | 0.133 |
| NFKB2_HUMAN | 3  | 0.258 | 0.208  | 0.231 | -0.285 | 0.290 | 0.093  | 0.074 |
| CY24B_HUMAN | 5  | 0.258 | 0.243  | 0.239 | -0.269 | 0.633 | 0.041  | 0.522 |
| MK14_HUMAN  | 5  | 0.258 | 0.002  | 0.243 | 0.264  | 0.152 | -0.251 | 0.358 |
| STK38_HUMAN | 4  | 0.257 | -0.056 | 0.312 | -0.291 | 0.143 | 0.223  | 0.207 |
| MRLC2_HUMAN | 10 | 0.257 | -0.095 | 0.046 | -0.160 | 0.246 | 0.315  | 0.368 |
| SNX27_HUMAN | 2  | 0.257 | 0.200  | 0.328 | 0.102  | 0.130 | -0.286 | 0.457 |
| USP9X_HUMAN | 2  | 0.257 | 0.300  | 0.535 | -0.113 | 0.091 | -0.171 | 0.626 |
| RAN_HUMAN   | 8  | 0.257 | -0.024 | 0.160 | -0.330 | 0.660 | 0.179  | 0.814 |
| RL3_HUMAN   | 2  | 0.256 | 0.184  | 0.192 | -0.288 | 0.066 | 0.120  | 0.258 |
| AMPD2_HUMAN | 2  | 0.256 | -0.208 | 0.371 | 0.289  | 0.622 | -0.066 | 0.994 |
| VATH_HUMAN  | 2  | 0.256 | 0.048  | 0.163 | -0.269 | 0.099 | 0.237  | 0.262 |
| PURA2_HUMAN | 6  | 0.255 | 0.003  | 0.287 | -0.074 | 0.060 | 0.402  | 0.586 |
| PDCD6_HUMAN | 2  | 0.255 | -0.040 | 0.061 | -0.224 | 0.541 | 0.279  | 0.603 |
| FUBP2_HUMAN | 4  | 0.254 | 0.114  | 0.015 | 0.129  | 0.410 | -0.318 | 0.174 |
| GMPR2_HUMAN | 3  | 0.253 | 0.052  | 0.250 | -0.268 | 0.249 | 0.232  | 0.068 |
| RANB3_HUMAN | 3  | 0.253 | 0.168  | 0.133 | 0.134  | 0.331 | -0.287 | 0.281 |
| US51_HUMAN  | 4  | 0.253 | 0.290  | 0.111 | -0.207 | 0.336 | 0.122  | 0.487 |
| PIMT_HUMAN  | 3  | 0.253 | 0.252  | 0.179 | -0.253 | 0.080 | 0.016  | 0.184 |
| DC11L_HUMAN | 4  | 0.252 | -0.031 | 0.069 | 0.369  | 0.107 | -0.098 | 0.386 |
| HS90A_HUMAN | 40 | 0.252 | -0.048 | 0.237 | 0.266  | 0.399 | -0.233 | 0.455 |
| ACPH_HUMAN  | 3  | 0.252 | -0.274 | 0.391 | 0.074  | 0.365 | 0.216  | 0.222 |
| NPC2_HUMAN  | 3  | 0.251 | -0.283 | 0.045 | 0.019  | 0.024 | 0.216  | 0.079 |
| RBGPR_HUMAN | 2  | 0.251 | 0.057  | 0.231 | 0.226  | 0.104 | -0.268 | 0.128 |
| UGPA_HUMAN  | 10 | 0.251 | -0.193 | 0.250 | -0.015 | 0.383 | 0.302  | 0.835 |
| HEXB_HUMAN  | 3  | 0.250 | -0.241 | 0.318 | -0.002 | 0.284 | 0.259  | 0.543 |
| ZYX_HUMAN   | 15 | 0.250 | -0.139 | 0.096 | 0.289  | 0.206 | -0.150 | 0.220 |
| PHTNS_HUMAN | 4  | 0.250 | 0.272  | 0.226 | -0.207 | 0.024 | -0.089 | 0.187 |
| AHNK_HUMAN  | 40 | 0.249 | 0.285  | 0.214 | -0.126 | 0.191 | -0.164 | 0.237 |
| PDXK_HUMAN  | 2  | 0.249 | 0.131  | 0.050 | 0.167  | 0.165 | -0.282 | 0.215 |
| LRBA_HUMAN  | 2  | 0.249 | -0.171 | 0.081 | -0.103 | 0.388 | 0.290  | 0.308 |
| ALDOC_HUMAN | 5  | 0.249 | -0.083 | 0.029 | -0.307 | 0.051 | 0.190  | 0.216 |
| TPP1_HUMAN  | 8  | 0.249 | -0.257 | 0.117 | 0.239  | 0.723 | -0.037 | 0.591 |
| LOX5_HUMAN  | 7  | 0.248 | 0.240  | 0.343 | -0.037 | 0.975 | -0.255 | 0.315 |
| NUMA1_HUMAN | 10 | 0.248 | 0.130  | 0.259 | -0.307 | 0.158 | 0.113  | 0.331 |
| RS19_HUMAN  | 2  | 0.247 | 0.199  | 0.057 | -0.273 | 0.156 | 0.089  | 0.099 |
| YS018_HUMAN | 2  | 0.247 | 0.290  | 0.043 | -0.140 | 0.281 | -0.134 | 0.324 |
| RL4_HUMAN   | 3  | 0.246 | 0.280  | 0.121 | -0.068 | 0.251 | -0.196 | 0.206 |
| S10A6_HUMAN | 8  | 0.245 | 0.079  | 0.458 | -0.269 | 0.713 | 0.205  | 0.824 |
| SYF_HUMAN   | 4  | 0.245 | 0.014  | 0.058 | 0.261  | 0.079 | -0.230 | 0.008 |
| SYNE1_HUMAN | 11 | 0.245 | 0.352  | 0.406 | 0.023  | 0.278 | -0.127 | 0.774 |
| GDI8_HUMAN  | 15 | 0.245 | 0.006  | 0.343 | -0.220 | 0.263 | 0.270  | 0.684 |
| ROCK1_HUMAN | 3  | 0.245 | 0.068  | 0.387 | 0.213  | 0.257 | -0.265 | 0.205 |
| TNPO3_HUMAN | 2  | 0.245 | -0.272 | 0.015 | 0.096  | 0.122 | 0.192  | 0.138 |
| GMPPA_HUMAN | 3  | 0.245 | -0.116 | 0.207 | -0.155 | 0.451 | 0.287  | 0.263 |
| OLA1_HUMAN  | 2  | 0.244 | -0.219 | 0.112 | -0.030 | 0.000 | 0.265  | 0.112 |
| S10A4_HUMAN | 11 | 0.244 | 0.033  | 0.213 | -0.321 | 0.222 | 0.147  | 0.201 |
| PROF1_HUMAN | 23 | 0.243 | -0.060 | 0.248 | 0.257  | 0.622 | -0.221 | 0.588 |
| VAV_HUMAN   | 4  | 0.243 | -0.152 | 0.219 | -0.056 | 0.085 | 0.309  | 0.085 |
| ARLY_HUMAN  | 2  | 0.243 | 0.255  | 0.144 | -0.229 | 0.122 | -0.011 | 0.022 |
| TSN_HUMAN   | 3  | 0.242 | -0.101 | 0.040 | -0.243 | 0.092 | 0.229  | 0.137 |
| ECHB_HUMAN  | 3  | 0.241 | 0.178  | 0.074 | -0.271 | 0.156 | 0.108  | 0.229 |
| PDC6I_HUMAN | 12 | 0.240 | -0.165 | 0.245 | 0.266  | 0.324 | -0.132 | 0.273 |
| RS20_HUMAN  | 3  | 0.240 | 0.258  | 0.181 | -0.218 | 0.191 | -0.025 | 0.080 |
| RS2_HUMAN   | 2  | 0.238 | 0.209  | 0.064 | 0.064  | 0.068 | -0.257 | 0.004 |

|             |     |       |        |       |        |       |        |       |
|-------------|-----|-------|--------|-------|--------|-------|--------|-------|
| RFA1_HUMAN  | 3   | 0.238 | -0.078 | 0.130 | -0.180 | 0.139 | 0.273  | 0.042 |
| HYOU1_HUMAN | 3   | 0.237 | 0.085  | 0.419 | 0.192  | 0.046 | -0.262 | 0.384 |
| H2B1C_HUMAN | 15  | 0.237 | -0.010 | 0.290 | 0.283  | 0.733 | -0.186 | 0.488 |
| DP13A_HUMAN | 2   | 0.237 | 0.263  | 0.089 | -0.047 | 0.129 | -0.201 | 0.040 |
| SAMH1_HUMAN | 8   | 0.235 | 0.236  | 0.126 | -0.235 | 0.150 | -0.004 | 0.127 |
| CP4F3_HUMAN | 3   | 0.234 | -0.253 | 0.182 | 0.065  | 0.317 | 0.203  | 0.381 |
| RL30_HUMAN  | 2   | 0.232 | 0.273  | 0.062 | -0.131 | 0.182 | -0.127 | 0.244 |
| DJC13_HUMAN | 4   | 0.231 | 0.305  | 0.210 | -0.144 | 0.845 | -0.014 | 0.614 |
| EPN4_HUMAN  | 3   | 0.231 | 0.059  | 0.193 | 0.204  | 0.183 | -0.248 | 0.177 |
| CHM4B_HUMAN | 3   | 0.231 | -0.172 | 0.365 | 0.266  | 0.156 | -0.078 | 0.466 |
| NUP50_HUMAN | 2   | 0.230 | 0.035  | 0.582 | -0.239 | 0.750 | 0.219  | 0.168 |
| H2AV_HUMAN  | 9   | 0.229 | 0.139  | 0.137 | -0.201 | 0.219 | 0.235  | 0.604 |
| PUR2_HUMAN  | 2   | 0.229 | -0.085 | 0.329 | 0.266  | 0.171 | -0.165 | 0.500 |
| RECO1_HUMAN | 4   | 0.229 | 0.158  | 0.116 | -0.270 | 0.062 | 0.085  | 0.151 |
| SDCB1_HUMAN | 2   | 0.229 | -0.024 | 0.163 | 0.247  | 0.212 | -0.207 | 0.375 |
| EFTU_HUMAN  | 2   | 0.228 | -0.217 | 0.651 | -0.007 | 0.219 | 0.239  | 0.870 |
| CORO7_HUMAN | 3   | 0.228 | 0.152  | 0.217 | -0.258 | 0.160 | 0.121  | 0.306 |
| CPZIP_HUMAN | 9   | 0.228 | -0.130 | 0.113 | 0.267  | 0.200 | -0.127 | 0.205 |
| SORCN_HUMAN | 2   | 0.228 | 0.161  | 0.148 | 0.111  | 0.004 | -0.256 | 0.152 |
| SEC63_HUMAN | 2   | 0.227 | 0.253  | 0.168 | -0.044 | 0.417 | -0.193 | 0.249 |
| MRP_HUMAN   | 2   | 0.227 | 0.200  | 0.459 | -0.243 | 0.043 | 0.058  | 0.502 |
| H1X_HUMAN   | 2   | 0.226 | 0.211  | 0.612 | 0.042  | 0.115 | -0.237 | 0.727 |
| GRB2_HUMAN  | 7   | 0.226 | 0.159  | 0.161 | 0.162  | 0.383 | -0.231 | 0.484 |
| SC22B_HUMAN | 4   | 0.226 | -0.042 | 0.059 | 0.225  | 0.259 | -0.224 | 0.380 |
| AMPB_HUMAN  | 9   | 0.225 | -0.246 | 0.273 | -0.103 | 0.124 | 0.196  | 0.410 |
| PIPNA_HUMAN | 2   | 0.224 | 0.221  | 0.037 | 0.021  | 0.162 | -0.226 | 0.125 |
| RS18_HUMAN  | 2   | 0.223 | 0.227  | 0.059 | 0.008  | 0.048 | -0.219 | 0.107 |
| DHX9_HUMAN  | 3   | 0.223 | 0.242  | 0.281 | -0.201 | 0.308 | -0.026 | 0.111 |
| LMNB2_HUMAN | 6   | 0.223 | 0.207  | 0.109 | -0.224 | 0.149 | 0.091  | 0.179 |
| RECO4_HUMAN | 2   | 0.223 | -0.103 | 0.124 | -0.143 | 0.327 | 0.261  | 0.203 |
| CY1_HUMAN   | 3   | 0.222 | -0.251 | 0.229 | 0.123  | 0.247 | 0.144  | 0.442 |
| TMSL3_HUMAN | 4   | 0.222 | -0.222 | 0.041 | 0.222  | 0.025 | 0.016  | 0.013 |
| PGRP_HUMAN  | 12  | 0.222 | 0.096  | 0.302 | 0.167  | 0.834 | -0.248 | 0.777 |
| ARP2_HUMAN  | 14  | 0.221 | -0.050 | 0.203 | -0.229 | 0.497 | 0.211  | 0.527 |
| COR1C_HUMAN | 5   | 0.220 | -0.010 | 0.070 | 0.256  | 0.207 | -0.182 | 0.110 |
| CEL2F_HUMAN | 2   | 0.220 | 0.244  | 0.236 | -0.189 | 0.013 | -0.040 | 0.223 |
| H14_HUMAN   | 7   | 0.220 | 0.168  | 0.136 | 0.093  | 0.176 | -0.245 | 0.180 |
| MDHM_HUMAN  | 7   | 0.220 | 0.232  | 0.198 | -0.011 | 0.316 | -0.206 | 0.306 |
| MP2K1_HUMAN | 2   | 0.218 | 0.053  | 0.343 | 0.195  | 0.207 | -0.233 | 0.550 |
| FUBP1_HUMAN | 5   | 0.217 | 0.247  | 0.155 | -0.184 | 0.090 | -0.008 | 0.047 |
| M6PBP_HUMAN | 10  | 0.217 | 0.148  | 0.543 | -0.203 | 0.408 | -0.247 | 0.293 |
| WIPF1_HUMAN | 3   | 0.216 | 0.108  | 0.331 | -0.243 | 0.520 | 0.150  | 0.568 |
| RD23A_HUMAN | 2   | 0.215 | 0.253  | 0.363 | -0.135 | 0.084 | -0.103 | 0.447 |
| ANXA4_HUMAN | 15  | 0.215 | -0.235 | 0.341 | 0.126  | 0.500 | 0.148  | 0.501 |
| MST4_HUMAN  | 2   | 0.215 | -0.147 | 0.228 | -0.088 | 0.052 | 0.251  | 0.176 |
| ACTC_HUMAN  | 5   | 0.214 | -0.162 | 0.389 | -0.177 | 0.241 | 0.201  | 0.174 |
| NBEL2_HUMAN | 9   | 0.214 | 0.011  | 0.283 | -0.260 | 0.409 | 0.162  | 0.381 |
| DSRAD_HUMAN | 3   | 0.213 | -0.013 | 0.011 | 0.275  | 0.287 | -0.142 | 0.208 |
| DYN2_HUMAN  | 3   | 0.213 | -0.048 | 0.141 | -0.176 | 0.281 | 0.239  | 0.409 |
| KU70_HUMAN  | 11  | 0.212 | 0.024  | 0.098 | -0.234 | 0.243 | 0.187  | 0.246 |
| ANM5_HUMAN  | 2   | 0.212 | 0.247  | 0.200 | -0.084 | 0.187 | -0.148 | 0.013 |
| DPP3_HUMAN  | 2   | 0.211 | 0.100  | 0.091 | -0.237 | 0.087 | 0.152  | 0.178 |
| TCPD_HUMAN  | 4   | 0.210 | 0.204  | 0.040 | -0.016 | 0.186 | -0.215 | 0.215 |
| NP1L1_HUMAN | 5   | 0.210 | 0.038  | 0.375 | 0.196  | 0.604 | -0.219 | 0.269 |
| F107B_HUMAN | 3   | 0.209 | 0.247  | 0.149 | -0.107 | 0.314 | -0.124 | 0.187 |
| BAP31_HUMAN | 4   | 0.209 | -0.137 | 0.098 | 0.256  | 0.116 | -0.063 | 0.068 |
| SFO1_HUMAN  | 2   | 0.209 | 0.055  | 0.248 | 0.185  | 0.077 | -0.224 | 0.171 |
| TCTP_HUMAN  | 2   | 0.209 | 0.206  | 0.175 | -0.211 | 0.343 | 0.021  | 0.168 |
| FBRL_HUMAN  | 6   | 0.209 | 0.150  | 0.456 | -0.234 | 0.179 | 0.100  | 0.546 |
| PSB8_HUMAN  | 2   | 0.209 | 0.198  | 0.003 | -0.216 | 0.200 | 0.034  | 0.197 |
| CENB2_HUMAN | 4   | 0.209 | 0.158  | 0.260 | -0.257 | 0.070 | -0.092 | 0.047 |
| UB2L3_HUMAN | 3   | 0.208 | -0.182 | 0.086 | 0.065  | 0.013 | 0.231  | 0.114 |
| PSA_HUMAN   | 5   | 0.208 | 0.088  | 0.293 | 0.001  | 0.545 | -0.307 | 0.338 |
| IMMT_HUMAN  | 5   | 0.207 | 0.064  | 0.205 | -0.189 | 0.095 | 0.222  | 0.207 |
| U2AF2_HUMAN | 2   | 0.207 | 0.241  | 0.091 | -0.147 | 0.163 | -0.079 | 0.254 |
| CAPG_HUMAN  | 11  | 0.206 | 0.044  | 0.313 | 0.179  | 0.133 | -0.226 | 0.359 |
| CATA_HUMAN  | 34  | 0.206 | 0.213  | 0.185 | -0.105 | 0.472 | -0.173 | 0.348 |
| EMAL2_HUMAN | 2   | 0.204 | 0.182  | 0.399 | -0.218 | 0.024 | 0.051  | 0.423 |
| RFA2_HUMAN  | 2   | 0.204 | 0.104  | 0.373 | -0.229 | 0.226 | 0.140  | 0.147 |
| EF2_HUMAN   | 20  | 0.203 | 0.245  | 0.288 | -0.016 | 0.412 | -0.155 | 0.466 |
| EVL_HUMAN   | 8   | 0.203 | -0.116 | 0.461 | -0.108 | 0.385 | 0.240  | 0.477 |
| VAT1_HUMAN  | 18  | 0.203 | -0.196 | 0.320 | 0.041  | 0.255 | 0.209  | 0.329 |
| HVCN1_HUMAN | 2   | 0.202 | 0.183  | 0.174 | 0.047  | 0.155 | -0.215 | 0.019 |
| SKAP2_HUMAN | 2   | 0.202 | -0.112 | 0.137 | 0.239  | 0.200 | -0.112 | 0.064 |
| AP1B1_HUMAN | 2   | 0.202 | -0.084 | 0.279 | 0.237  | 0.246 | -0.137 | 0.033 |
| PP1R7_HUMAN | 2   | 0.201 | 0.235  | 0.135 | -0.136 | 0.161 | -0.084 | 0.296 |
| AB48R_HUMAN | 12  | 0.201 | 0.165  | 0.287 | 0.072  | 0.079 | -0.220 | 0.267 |
| APMAP_HUMAN | 9   | 0.201 | -0.164 | 0.091 | -0.026 | 0.561 | 0.232  | 0.399 |
| HINT1_HUMAN | 2   | 0.201 | -0.102 | 0.301 | 0.237  | 0.502 | -0.119 | 0.201 |
| RL5_HUMAN   | 6   | 0.200 | -0.145 | 0.181 | -0.032 | 0.289 | 0.244  | 0.065 |
| FLNA_HUMAN  | 113 | 0.199 | -0.197 | 0.235 | 0.201  | 0.551 | -0.005 | 0.486 |
| THIO_HUMAN  | 6   | 0.199 | -0.028 | 0.257 | 0.255  | 0.205 | -0.129 | 0.163 |
| UBP2L_HUMAN | 2   | 0.199 | -0.131 | 0.254 | 0.233  | 0.224 | -0.086 | 0.030 |
| PRSG6_HUMAN | 2   | 0.198 | -0.198 | 0.182 | 0.016  | 0.313 | 0.197  | 0.495 |
| PRPS1_HUMAN | 7   | 0.197 | 0.056  | 0.795 | -0.212 | 0.215 | 0.171  | 0.739 |
| ANX11_HUMAN | 15  | 0.196 | 0.115  | 0.322 | -0.231 | 0.380 | 0.105  | 0.434 |
| DHE3_HUMAN  | 4   | 0.196 | 0.108  | 0.230 | -0.229 | 0.061 | 0.115  | 0.038 |
| GSTK1_HUMAN | 3   | 0.196 | 0.057  | 0.312 | -0.212 | 0.513 | 0.170  | 0.825 |
| PSD13_HUMAN | 2   | 0.196 | 0.094  | 0.379 | 0.141  | 0.051 | -0.220 | 0.430 |
| CPNE3_HUMAN | 11  | 0.196 | -0.220 | 0.147 | 0.144  | 0.098 | 0.088  | 0.218 |
| IFIX_HUMAN  | 2   | 0.196 | 0.170  | 0.046 | -0.212 | 0.220 | 0.057  | 0.266 |
| DIAP1_HUMAN | 9   | 0.195 | -0.128 | 0.168 | 0.213  | 0.039 | -0.122 | 0.236 |
| PR57_HUMAN  | 3   | 0.195 | -0.174 | 0.249 | -0.024 | 0.156 | 0.213  | 0.243 |
| DBNL_HUMAN  | 14  | 0.195 | 0.023  | 0.094 | -0.173 | 0.232 | 0.217  | 0.284 |
| HNRPU_HUMAN | 11  | 0.195 | 0.154  | 0.347 | -0.202 | 0.167 | 0.114  | 0.260 |
| MDHC_HUMAN  | 10  | 0.195 | 0.027  | 0.161 | -0.152 | 0.330 | 0.237  | 0.186 |
| ASC_HUMAN   | 4   | 0.194 | 0.143  | 0.390 | -0.217 | 0.139 | 0.090  | 0.503 |
| SYSC_HUMAN  | 5   | 0.194 | -0.152 | 0.181 | 0.205  | 0.126 | 0.158  | 0.062 |

|             |     |       |        |       |        |       |        |       |
|-------------|-----|-------|--------|-------|--------|-------|--------|-------|
| HNRPF_HUMAN | 4   | 0.194 | 0.136  | 0.077 | -0.249 | 0.293 | -0.091 | 0.279 |
| LIS1_HUMAN  | 4   | 0.192 | 0.081  | 0.236 | 0.083  | 0.104 | -0.251 | 0.213 |
| PTX3_HUMAN  | 5   | 0.192 | 0.171  | 0.176 | -0.206 | 0.093 | 0.050  | 0.196 |
| PRDX1_HUMAN | 6   | 0.192 | -0.281 | 0.358 | 0.075  | 0.403 | 0.020  | 0.129 |
| SFPQ_HUMAN  | 7   | 0.191 | 0.239  | 0.243 | -0.136 | 0.267 | -0.010 | 0.269 |
| NHERF_HUMAN | 7   | 0.190 | 0.115  | 0.500 | -0.018 | 0.265 | -0.260 | 0.235 |
| SET_HUMAN   | 4   | 0.190 | -0.042 | 0.061 | 0.222  | 0.216 | -0.147 | 0.566 |
| ATPB_HUMAN  | 10  | 0.190 | 0.167  | 0.318 | -0.163 | 0.261 | 0.163  | 0.219 |
| GBB2_HUMAN  | 5   | 0.189 | -0.175 | 0.170 | -0.007 | 0.027 | 0.203  | 0.110 |
| TFIP8_HUMAN | 2   | 0.189 | 0.204  | 0.006 | -0.172 | 0.167 | -0.017 | 0.173 |
| RBBP4_HUMAN | 3   | 0.188 | 0.222  | 0.390 | -0.112 | 0.228 | -0.095 | 0.341 |
| SAC1_HUMAN  | 3   | 0.188 | -0.209 | 0.377 | 0.142  | 0.430 | 0.083  | 0.807 |
| BASP_HUMAN  | 22  | 0.188 | -0.191 | 0.206 | 0.106  | 0.287 | 0.158  | 0.384 |
| PIPB_HUMAN  | 5   | 0.187 | 0.121  | 0.068 | 0.020  | 0.043 | -0.241 | 0.194 |
| TMOD3_HUMAN | 3   | 0.185 | -0.179 | 0.167 | 0.003  | 0.223 | 0.192  | 0.365 |
| H15_HUMAN   | 8   | 0.185 | 0.066  | 0.352 | 0.044  | 0.036 | -0.265 | 0.393 |
| WDR1_HUMAN  | 24  | 0.184 | 0.030  | 0.510 | 0.197  | 0.602 | -0.170 | 0.636 |
| PRS6A_HUMAN | 3   | 0.183 | -0.140 | 0.366 | -0.055 | 0.345 | 0.211  | 0.706 |
| CASP4_HUMAN | 2   | 0.183 | -0.111 | 0.000 | -0.090 | 0.135 | 0.216  | 0.135 |
| HPRT_HUMAN  | 6   | 0.183 | 0.067  | 0.073 | -0.215 | 0.318 | 0.128  | 0.369 |
| NUCL_HUMAN  | 13  | 0.183 | 0.151  | 0.230 | -0.214 | 0.101 | -0.047 | 0.358 |
| PLCB_HUMAN  | 2   | 0.182 | -0.069 | 0.098 | 0.212  | 0.232 | -0.127 | 0.330 |
| IDHC_HUMAN  | 5   | 0.181 | 0.010  | 0.410 | 0.183  | 0.380 | -0.178 | 0.779 |
| EF1A1_HUMAN | 21  | 0.181 | -0.027 | 0.217 | 0.171  | 0.187 | -0.190 | 0.411 |
| RBM25_HUMAN | 4   | 0.180 | 0.213  | 0.202 | -0.099 | 0.318 | -0.099 | 0.283 |
| IF3E1_HUMAN | 2   | 0.179 | 0.061  | 0.140 | -0.195 | 0.572 | 0.150  | 0.712 |
| LMNB1_HUMAN | 24  | 0.179 | 0.207  | 0.209 | -0.070 | 0.146 | -0.127 | 0.380 |
| DHB11_HUMAN | 4   | 0.179 | 0.167  | 0.107 | 0.011  | 0.185 | -0.189 | 0.213 |
| AK1A1_HUMAN | 3   | 0.178 | 0.138  | 0.029 | 0.075  | 0.115 | -0.197 | 0.087 |
| ARHG2_HUMAN | 2   | 0.178 | -0.050 | 0.270 | 0.204  | 0.405 | -0.139 | 0.135 |
| RRAGC_HUMAN | 2   | 0.178 | 0.073  | 0.435 | 0.139  | 0.141 | -0.196 | 0.294 |
| PRAF3_HUMAN | 2   | 0.178 | 0.119  | 0.104 | -0.200 | 0.118 | 0.096  | 0.221 |
| PERM_HUMAN  | 74  | 0.177 | -0.190 | 0.388 | 0.054  | 0.534 | 0.154  | 0.575 |
| H2AY_HUMAN  | 21  | 0.176 | 0.180  | 0.287 | -0.172 | 0.215 | -0.024 | 0.301 |
| CDV3_HUMAN  | 6   | 0.176 | 0.204  | 0.260 | -0.131 | 0.082 | -0.058 | 0.196 |
| TAGL2_HUMAN | 11  | 0.176 | 0.063  | 0.175 | 0.139  | 0.158 | -0.196 | 0.133 |
| ARHG1_HUMAN | 9   | 0.175 | -0.022 | 0.262 | -0.155 | 0.251 | 0.192  | 0.373 |
| KU86_HUMAN  | 10  | 0.175 | 0.032  | 0.263 | -0.196 | 0.093 | 0.149  | 0.248 |
| OGFR_HUMAN  | 3   | 0.175 | 0.188  | 0.248 | -0.161 | 0.228 | -0.011 | 0.111 |
| MYH9_HUMAN  | 131 | 0.175 | -0.048 | 0.349 | 0.188  | 0.285 | -0.153 | 0.374 |
| SAP_HUMAN   | 11  | 0.174 | -0.175 | 0.242 | 0.168  | 0.307 | 0.051  | 0.349 |
| ITB2_HUMAN  | 26  | 0.174 | 0.053  | 0.188 | 0.150  | 0.424 | -0.188 | 0.388 |
| PDIA6_HUMAN | 5   | 0.174 | 0.021  | 0.006 | 0.182  | 0.315 | -0.165 | 0.197 |
| CEND2_HUMAN | 3   | 0.174 | -0.069 | 0.115 | -0.119 | 0.232 | 0.204  | 0.343 |
| KINH_HUMAN  | 7   | 0.173 | -0.148 | 0.135 | 0.179  | 0.243 | 0.112  | 0.127 |
| HNRPQ_HUMAN | 6   | 0.173 | 0.172  | 0.403 | -0.138 | 0.071 | 0.148  | 0.604 |
| DYSF_HUMAN  | 11  | 0.173 | -0.107 | 0.134 | 0.050  | 0.118 | 0.239  | 0.416 |
| SNAI_HUMAN  | 5   | 0.172 | 0.049  | 0.146 | -0.295 | 0.439 | -0.099 | 0.278 |
| AP2A1_HUMAN | 4   | 0.172 | 0.122  | 0.155 | 0.187  | 0.178 | -0.137 | 0.382 |
| PSME1_HUMAN | 8   | 0.171 | -0.073 | 0.282 | -0.054 | 0.202 | 0.232  | 0.422 |
| NONO_HUMAN  | 5   | 0.170 | 0.194  | 0.307 | -0.122 | 0.128 | -0.071 | 0.068 |
| ESYT1_HUMAN | 3   | 0.170 | 0.024  | 0.179 | 0.164  | 0.553 | -0.173 | 0.403 |
| FLII_HUMAN  | 3   | 0.169 | -0.080 | 0.022 | 0.200  | 0.046 | -0.105 | 0.059 |
| CD45_HUMAN  | 13  | 0.169 | 0.022  | 0.199 | 0.072  | 0.185 | -0.243 | 0.473 |
| SC31A_HUMAN | 2   | 0.168 | 0.071  | 0.062 | -0.186 | 0.008 | 0.130  | 0.070 |
| GYS1_HUMAN  | 6   | 0.168 | 0.075  | 0.275 | 0.127  | 0.215 | -0.186 | 0.463 |
| 1433Z_HUMAN | 18  | 0.167 | 0.105  | 0.204 | 0.158  | 0.591 | -0.154 | 0.468 |
| ARS2_HUMAN  | 4   | 0.166 | 0.137  | 0.213 | -0.005 | 0.253 | -0.195 | 0.188 |
| OGR1_HUMAN  | 2   | 0.166 | 0.178  | 0.076 | -0.009 | 0.146 | -0.154 | 0.222 |
| AKP13_HUMAN | 2   | 0.166 | 0.195  | 0.078 | -0.066 | 0.035 | -0.114 | 0.043 |
| STMN1_HUMAN | 4   | 0.166 | -0.155 | 0.181 | 0.160  | 0.293 | 0.092  | 0.497 |
| EFHD2_HUMAN | 6   | 0.166 | 0.109  | 0.062 | -0.124 | 0.265 | 0.196  | 0.151 |
| EHD1_HUMAN  | 15  | 0.165 | -0.120 | 0.286 | -0.075 | 0.438 | 0.185  | 0.305 |
| STIM1_HUMAN | 2   | 0.164 | -0.053 | 0.002 | 0.190  | 0.328 | -0.122 | 0.330 |
| CSN4_HUMAN  | 2   | 0.164 | 0.170  | 0.133 | 0.002  | 0.164 | -0.157 | 0.030 |
| FKBP4_HUMAN | 2   | 0.164 | 0.163  | 0.369 | 0.016  | 0.167 | -0.164 | 0.202 |
| GLYG_HUMAN  | 12  | 0.164 | 0.094  | 0.233 | 0.080  | 0.500 | -0.196 | 0.833 |
| ABHEB_HUMAN | 4   | 0.163 | -0.174 | 0.115 | 0.146  | 0.533 | 0.043  | 0.589 |
| GSK3B_HUMAN | 2   | 0.163 | -0.183 | 0.050 | 0.084  | 0.967 | 0.114  | 1.016 |
| RAB14_HUMAN | 6   | 0.163 | -0.097 | 0.223 | 0.193  | 0.199 | -0.080 | 0.378 |
| RAB3D_HUMAN | 3   | 0.163 | 0.188  | 0.083 | -0.123 | 0.093 | -0.050 | 0.172 |
| PABP1_HUMAN | 6   | 0.162 | 0.148  | 0.145 | -0.171 | 0.184 | 0.039  | 0.286 |
| RAB5B_HUMAN | 5   | 0.162 | -0.209 | 0.149 | 0.109  | 0.099 | -0.001 | 0.225 |
| TPM3L_HUMAN | 7   | 0.161 | 0.127  | 0.406 | -0.180 | 0.438 | -0.112 | 0.392 |
| GDE_HUMAN   | 4   | 0.160 | -0.061 | 0.070 | -0.130 | 0.155 | 0.175  | 0.103 |
| VIME_HUMAN  | 56  | 0.159 | 0.159  | 0.325 | -0.142 | 0.401 | 0.097  | 0.335 |
| PSIP1_HUMAN | 3   | 0.159 | -0.106 | 0.516 | -0.066 | 0.354 | 0.187  | 0.778 |
| PSB4_HUMAN  | 2   | 0.159 | 0.143  | 0.461 | -0.169 | 0.033 | 0.041  | 0.494 |
| FYB_HUMAN   | 4   | 0.158 | -0.002 | 0.136 | 0.166  | 0.100 | -0.149 | 0.149 |
| GLOD4_HUMAN | 4   | 0.158 | 0.072  | 0.041 | -0.195 | 0.097 | 0.085  | 0.070 |
| SEPT7_HUMAN | 8   | 0.158 | 0.153  | 0.184 | 0.022  | 0.359 | -0.160 | 0.288 |
| EF1G_HUMAN  | 10  | 0.157 | -0.155 | 0.259 | 0.132  | 0.159 | -0.122 | 0.069 |
| LA_HUMAN    | 3   | 0.157 | 0.041  | 0.264 | -0.167 | 0.182 | 0.141  | 0.234 |
| HNRPL_HUMAN | 11  | 0.157 | 0.160  | 0.275 | -0.154 | 0.356 | 0.010  | 0.369 |
| RENT1_HUMAN | 3   | 0.156 | 0.129  | 0.346 | 0.057  | 0.249 | -0.171 | 0.226 |
| HDAC1_HUMAN | 3   | 0.156 | 0.182  | 0.115 | -0.052 | 0.032 | -0.115 | 0.147 |
| MICA1_HUMAN | 3   | 0.156 | -0.148 | 0.132 | 0.000  | 0.399 | 0.163  | 0.308 |
| ELMO1_HUMAN | 3   | 0.154 | 0.103  | 0.095 | -0.173 | 0.101 | 0.085  | 0.166 |
| ATPA_HUMAN  | 7   | 0.154 | 0.178  | 0.222 | -0.121 | 0.127 | 0.093  | 0.344 |
| SAHH_HUMAN  | 7   | 0.153 | 0.095  | 0.181 | -0.207 | 0.337 | -0.006 | 0.210 |
| CATS_HUMAN  | 5   | 0.153 | -0.182 | 0.289 | -0.023 | 0.284 | 0.124  | 0.151 |
| PPGB_HUMAN  | 3   | 0.153 | -0.071 | 0.373 | -0.096 | 0.166 | 0.182  | 0.307 |
| SF3B1_HUMAN | 5   | 0.153 | 0.123  | 0.390 | -0.168 | 0.349 | 0.060  | 0.385 |
| STX11_HUMAN | 2   | 0.153 | 0.032  | 0.319 | -0.160 | 0.162 | 0.143  | 0.158 |
| PGK1_HUMAN  | 36  | 0.152 | 0.132  | 0.286 | 0.056  | 0.432 | -0.161 | 0.474 |
| SIPA1_HUMAN | 3   | 0.152 | -0.062 | 0.090 | -0.102 | 0.122 | 0.179  | 0.208 |
| IPYR_HUMAN  | 2   | 0.151 | 0.178  | 0.407 | -0.102 | 0.207 | -0.061 | 0.613 |
| ESTD_HUMAN  | 6   | 0.151 | 0.012  | 0.169 | -0.106 | 0.296 | 0.194  | 0.309 |

|             |     |       |        |       |        |       |        |       |
|-------------|-----|-------|--------|-------|--------|-------|--------|-------|
| TBL1R_HUMAN | 2   | 0.151 | 0.080  | 0.250 | 0.104  | 0.106 | -0.168 | 0.143 |
| TRFL_HUMAN  | 109 | 0.151 | 0.097  | 0.308 | -0.191 | 0.735 | 0.030  | 0.661 |
| ILF2_HUMAN  | 3   | 0.150 | -0.158 | 0.131 | 0.037  | 0.336 | 0.137  | 0.205 |
| CAN1_HUMAN  | 10  | 0.150 | 0.199  | 0.275 | -0.010 | 0.484 | -0.092 | 0.256 |
| NCF4_HUMAN  | 5   | 0.149 | 0.065  | 0.188 | 0.115  | 0.137 | -0.165 | 0.118 |
| ROA3_HUMAN  | 6   | 0.147 | 0.156  | 0.067 | -0.136 | 0.176 | 0.044  | 0.206 |
| IQGA1_HUMAN | 39  | 0.146 | 0.122  | 0.229 | -0.156 | 0.286 | 0.064  | 0.321 |
| DENR_HUMAN  | 3   | 0.146 | 0.158  | 0.164 | -0.010 | 0.232 | -0.133 | 0.329 |
| FKBP5_HUMAN | 3   | 0.146 | 0.167  | 0.200 | -0.115 | 0.331 | -0.037 | 0.201 |
| HNRH3_HUMAN | 4   | 0.145 | 0.012  | 0.331 | -0.007 | 0.424 | -0.248 | 0.258 |
| SHIP1_HUMAN | 7   | 0.145 | 0.116  | 0.296 | -0.154 | 0.076 | -0.108 | 0.274 |
| TXND5_HUMAN | 2   | 0.144 | 0.144  | 0.360 | 0.015  | 0.248 | -0.144 | 0.112 |
| DCTN1_HUMAN | 8   | 0.144 | -0.049 | 0.040 | -0.156 | 0.178 | 0.129  | 0.236 |
| PDIA1_HUMAN | 24  | 0.144 | -0.170 | 0.456 | 0.117  | 0.585 | -0.003 | 0.451 |
| HNRPK_HUMAN | 12  | 0.144 | 0.171  | 0.198 | -0.086 | 0.144 | -0.069 | 0.169 |
| MOES_HUMAN  | 31  | 0.144 | 0.002  | 0.330 | -0.164 | 0.385 | 0.122  | 0.282 |
| LRRF1_HUMAN | 14  | 0.144 | 0.149  | 0.150 | 0.000  | 0.139 | -0.139 | 0.107 |
| ACTN4_HUMAN | 32  | 0.144 | 0.017  | 0.255 | 0.153  | 0.265 | -0.134 | 0.231 |
| G3P_HUMAN   | 44  | 0.143 | -0.084 | 0.396 | 0.142  | 0.721 | -0.123 | 0.641 |
| 1433B_HUMAN | 8   | 0.143 | 0.262  | 0.272 | -0.008 | 0.500 | 0.048  | 0.200 |
| KAD2_HUMAN  | 3   | 0.142 | 0.139  | 0.262 | 0.021  | 0.249 | -0.144 | 0.247 |
| DPC5_HUMAN  | 2   | 0.142 | -0.146 | 0.525 | 0.137  | 0.057 | 0.025  | 0.582 |
| PRKDC_HUMAN | 10  | 0.142 | 0.044  | 0.260 | -0.204 | 0.134 | 0.040  | 0.319 |
| SMHD1_HUMAN | 5   | 0.142 | -0.013 | 0.131 | -0.224 | 0.265 | 0.045  | 0.074 |
| TCPO_HUMAN  | 11  | 0.142 | 0.019  | 0.233 | 0.080  | 0.138 | -0.190 | 0.401 |
| VAPA_HUMAN  | 3   | 0.142 | -0.155 | 0.091 | 0.112  | 0.460 | 0.059  | 0.421 |
| RAC2_HUMAN  | 12  | 0.141 | -0.091 | 0.138 | 0.000  | 0.217 | 0.186  | 0.347 |
| ITAM_HUMAN  | 39  | 0.141 | 0.140  | 0.324 | -0.081 | 0.350 | -0.122 | 0.511 |
| ACTG_HUMAN  | 82  | 0.141 | -0.100 | 0.327 | 0.180  | 0.575 | 0.017  | 0.617 |
| ROA1_HUMAN  | 11  | 0.140 | 0.126  | 0.212 | -0.150 | 0.283 | -0.058 | 0.244 |
| GBB1_HUMAN  | 2   | 0.140 | 0.154  | 0.318 | -0.014 | 0.210 | -0.125 | 0.109 |
| RS3_HUMAN   | 3   | 0.139 | 0.099  | 0.197 | 0.071  | 0.007 | -0.155 | 0.190 |
| RHG25_HUMAN | 5   | 0.139 | 0.104  | 0.221 | -0.110 | 0.211 | -0.156 | 0.113 |
| G6P1_HUMAN  | 38  | 0.139 | 0.014  | 0.332 | 0.148  | 0.524 | -0.130 | 0.554 |
| OSTF1_HUMAN | 4   | 0.139 | 0.200  | 0.085 | -0.069 | 0.199 | 0.008  | 0.366 |
| H2A1H_HUMAN | 4   | 0.138 | 0.134  | 0.038 | -0.120 | 0.150 | 0.100  | 0.235 |
| SCAM2_HUMAN | 2   | 0.137 | -0.043 | 0.228 | 0.160  | 0.056 | -0.101 | 0.285 |
| IF4A1_HUMAN | 6   | 0.137 | 0.076  | 0.170 | 0.063  | 0.058 | -0.167 | 0.166 |
| GMFG_HUMAN  | 10  | 0.136 | 0.141  | 0.264 | 0.017  | 0.366 | -0.131 | 0.204 |
| PGM1_HUMAN  | 11  | 0.136 | 0.153  | 0.235 | -0.090 | 0.140 | -0.073 | 0.256 |
| CLH1_HUMAN  | 26  | 0.135 | -0.002 | 0.213 | 0.014  | 0.332 | 0.240  | 0.717 |
| SASH3_HUMAN | 3   | 0.135 | 0.152  | 0.084 | -0.023 | 0.074 | -0.113 | 0.076 |
| ENPL_HUMAN  | 11  | 0.135 | -0.017 | 0.373 | 0.150  | 0.278 | -0.117 | 0.487 |
| LDHB_HUMAN  | 17  | 0.135 | -0.099 | 0.108 | 0.150  | 0.479 | -0.064 | 0.581 |
| PDIA3_HUMAN | 26  | 0.134 | 0.122  | 0.161 | 0.038  | 0.185 | -0.141 | 0.208 |
| COF1_HUMAN  | 13  | 0.134 | -0.092 | 0.207 | 0.120  | 0.314 | 0.157  | 0.290 |
| SEPT2_HUMAN | 2   | 0.134 | 0.147  | 0.290 | -0.012 | 0.047 | -0.120 | 0.337 |
| HNRPD_HUMAN | 9   | 0.133 | -0.147 | 0.201 | 0.117  | 0.416 | -0.043 | 0.255 |
| ANXA3_HUMAN | 24  | 0.133 | 0.064  | 0.308 | 0.166  | 0.482 | -0.099 | 0.544 |
| GRAP1_HUMAN | 2   | 0.133 | -0.012 | 0.342 | 0.146  | 0.192 | -0.119 | 0.150 |
| PYGL_HUMAN  | 30  | 0.133 | 0.112  | 0.375 | -0.138 | 0.392 | 0.066  | 0.453 |
| DYH1_HUMAN  | 13  | 0.133 | 0.066  | 0.209 | -0.147 | 0.319 | 0.097  | 0.457 |
| ARPC5_HUMAN | 8   | 0.133 | 0.148  | 0.344 | -0.116 | 0.562 | -0.017 | 0.673 |
| STRAP_HUMAN | 3   | 0.131 | -0.133 | 0.124 | 0.128  | 0.272 | 0.021  | 0.182 |
| OSB18_HUMAN | 2   | 0.131 | 0.061  | 0.119 | 0.099  | 0.183 | -0.145 | 0.303 |
| ARF6_HUMAN  | 2   | 0.131 | 0.153  | 0.249 | -0.097 | 0.379 | -0.040 | 0.130 |
| CYC_HUMAN   | 2   | 0.131 | 0.122  | 0.032 | -0.137 | 0.174 | 0.030  | 0.142 |
| VPP3_HUMAN  | 2   | 0.130 | 0.155  | 0.290 | -0.056 | 0.165 | -0.083 | 0.125 |
| XPO1_HUMAN  | 4   | 0.130 | 0.066  | 0.142 | 0.013  | 0.059 | -0.181 | 0.266 |
| G3BP1_HUMAN | 5   | 0.130 | -0.045 | 0.149 | -0.031 | 0.709 | 0.187  | 0.084 |
| GANAB_HUMAN | 13  | 0.130 | 0.090  | 0.242 | -0.162 | 0.348 | -0.092 | 0.316 |
| HSP74_HUMAN | 6   | 0.130 | -0.013 | 0.299 | 0.143  | 0.190 | -0.114 | 0.225 |
| DC112_HUMAN | 4   | 0.130 | -0.092 | 0.119 | -0.020 | 0.172 | 0.160  | 0.157 |
| CAB39_HUMAN | 3   | 0.129 | 0.154  | 0.188 | -0.064 | 0.117 | -0.075 | 0.160 |
| GSTP1_HUMAN | 15  | 0.129 | 0.138  | 0.226 | 0.061  | 0.546 | -0.114 | 0.476 |
| STA5B_HUMAN | 5   | 0.128 | -0.065 | 0.045 | -0.145 | 0.112 | 0.107  | 0.224 |
| AN32B_HUMAN | 7   | 0.128 | -0.042 | 0.111 | 0.208  | 0.286 | 0.036  | 0.297 |
| RIPK1_HUMAN | 2   | 0.128 | 0.061  | 0.567 | 0.096  | 0.677 | -0.141 | 0.111 |
| FKB15_HUMAN | 3   | 0.128 | -0.088 | 0.250 | 0.151  | 0.148 | -0.048 | 0.308 |
| COPB2_HUMAN | 2   | 0.127 | -0.018 | 0.093 | 0.143  | 0.090 | -0.109 | 0.183 |
| EIF3I_HUMAN | 3   | 0.127 | -0.044 | 0.187 | -0.090 | 0.053 | 0.149  | 0.145 |
| CHP1_HUMAN  | 2   | 0.127 | 0.069  | 0.070 | 0.087  | 0.368 | -0.141 | 0.299 |
| STIP1_HUMAN | 6   | 0.126 | -0.033 | 0.246 | 0.146  | 0.154 | -0.098 | 0.331 |
| VPS4B_HUMAN | 3   | 0.126 | -0.088 | 0.472 | -0.044 | 0.137 | 0.148  | 0.609 |
| CQ049_HUMAN | 3   | 0.125 | -0.108 | 0.185 | -0.016 | 0.135 | 0.140  | 0.073 |
| UBC9_HUMAN  | 2   | 0.125 | 0.058  | 0.089 | -0.138 | 0.797 | 0.095  | 0.886 |
| GDIR2_HUMAN | 15  | 0.125 | -0.155 | 0.231 | 0.083  | 0.322 | 0.028  | 0.266 |
| DOPD_HUMAN  | 4   | 0.124 | -0.130 | 0.129 | 0.107  | 0.542 | 0.051  | 0.174 |
| ACTN1_HUMAN | 58  | 0.123 | -0.138 | 0.250 | 0.108  | 0.351 | 0.008  | 0.443 |
| RAB10_HUMAN | 2   | 0.123 | -0.054 | 0.152 | 0.147  | 0.011 | -0.077 | 0.141 |
| NCF2_HUMAN  | 14  | 0.123 | 0.055  | 0.086 | -0.146 | 0.169 | 0.078  | 0.183 |
| STOM_HUMAN  | 6   | 0.123 | -0.083 | 0.072 | 0.159  | 0.278 | 0.004  | 0.163 |
| ADDA_HUMAN  | 4   | 0.123 | -0.096 | 0.060 | 0.150  | 0.242 | 0.034  | 0.337 |
| RL7A_HUMAN  | 3   | 0.122 | 0.006  | 0.128 | 0.127  | 0.464 | -0.118 | 0.554 |
| PAK2_HUMAN  | 7   | 0.122 | 0.081  | 0.324 | -0.135 | 0.194 | 0.070  | 0.392 |
| 2AA_A_HUMAN | 5   | 0.122 | 0.094  | 0.124 | 0.055  | 0.221 | -0.133 | 0.134 |
| GSHR_HUMAN  | 8   | 0.122 | 0.029  | 0.211 | -0.073 | 0.129 | -0.213 | 0.531 |
| 1433G_HUMAN | 3   | 0.121 | -0.122 | 0.247 | 0.118  | 0.169 | 0.019  | 0.362 |
| EF1D_HUMAN  | 4   | 0.120 | 0.018  | 0.097 | -0.121 | 0.056 | 0.118  | 0.140 |
| TPD54_HUMAN | 2   | 0.119 | -0.060 | 0.187 | 0.143  | 0.154 | -0.067 | 0.033 |
| LSP1_HUMAN  | 14  | 0.119 | 0.120  | 0.202 | -0.094 | 0.388 | -0.077 | 0.444 |
| RS4X_HUMAN  | 2   | 0.119 | -0.078 | 0.077 | -0.048 | 0.269 | 0.141  | 0.192 |
| TERA_HUMAN  | 11  | 0.119 | 0.032  | 0.264 | -0.125 | 0.157 | 0.108  | 0.254 |
| NLR4_HUMAN  | 4   | 0.119 | -0.078 | 0.082 | 0.092  | 0.069 | 0.151  | 0.078 |
| PRDX6_HUMAN | 9   | 0.119 | -0.087 | 0.406 | 0.139  | 0.297 | -0.036 | 0.637 |
| GRP2_HUMAN  | 4   | 0.118 | -0.017 | 0.056 | -0.067 | 0.129 | -0.241 | 0.331 |
| CH60_HUMAN  | 4   | 0.117 | 0.132  | 0.137 | 0.134  | 0.083 | -0.070 | 0.142 |
| KPYM_HUMAN  | 42  | 0.117 | -0.110 | 0.319 | -0.016 | 0.387 | 0.122  | 0.418 |

|             |    |       |        |       |        |       |        |       |
|-------------|----|-------|--------|-------|--------|-------|--------|-------|
| CAZA1_HUMAN | 16 | 0.117 | 0.072  | 0.133 | -0.055 | 0.416 | -0.162 | 0.190 |
| HSP71_HUMAN | 34 | 0.117 | -0.126 | 0.187 | 0.009  | 0.666 | 0.107  | 0.568 |
| PCNP_HUMAN  | 2  | 0.117 | -0.055 | 0.062 | 0.140  | 0.179 | -0.069 | 0.241 |
| SVIL_HUMAN  | 4  | 0.116 | 0.097  | 0.010 | -0.133 | 0.058 | -0.041 | 0.150 |
| FGR_HUMAN   | 7  | 0.116 | -0.052 | 0.459 | -0.071 | 0.286 | 0.139  | 0.393 |
| PGAM1_HUMAN | 18 | 0.116 | -0.154 | 0.206 | 0.069  | 0.594 | 0.013  | 0.358 |
| RL27_HUMAN  | 2  | 0.116 | -0.085 | 0.147 | -0.035 | 0.937 | 0.136  | 0.790 |
| STK10_HUMAN | 11 | 0.116 | 0.119  | 0.359 | -0.112 | 0.405 | 0.009  | 0.318 |
| CA128_HUMAN | 3  | 0.116 | 0.018  | 0.326 | -0.116 | 0.358 | 0.114  | 0.381 |
| PSA1_HUMAN  | 4  | 0.115 | -0.001 | 0.051 | -0.107 | 0.267 | 0.123  | 0.236 |
| SPB10_HUMAN | 11 | 0.115 | 0.104  | 0.160 | -0.004 | 0.287 | -0.126 | 0.235 |
| LYPE1_HUMAN | 2  | 0.113 | 0.133  | 0.456 | -0.036 | 0.190 | -0.081 | 0.266 |
| PSB9_HUMAN  | 2  | 0.112 | -0.055 | 0.072 | 0.135  | 0.319 | -0.065 | 0.392 |
| KSYK_HUMAN  | 9  | 0.112 | -0.161 | 0.230 | -0.017 | 0.195 | 0.059  | 0.354 |
| FA49B_HUMAN | 8  | 0.111 | -0.023 | 0.256 | 0.150  | 0.426 | -0.057 | 0.381 |
| DOK3_HUMAN  | 3  | 0.110 | -0.068 | 0.291 | -0.048 | 0.134 | 0.131  | 0.387 |
| MYO9B_HUMAN | 2  | 0.109 | 0.118  | 0.084 | -0.098 | 0.082 | -0.004 | 0.166 |
| GLGB_HUMAN  | 7  | 0.108 | -0.137 | 0.252 | 0.023  | 0.013 | 0.067  | 0.288 |
| ROA2_HUMAN  | 13 | 0.107 | 0.124  | 0.246 | -0.090 | 0.157 | 0.017  | 0.262 |
| COPD_HUMAN  | 3  | 0.107 | -0.084 | 0.101 | -0.024 | 0.311 | 0.124  | 0.368 |
| CYFP2_HUMAN | 4  | 0.107 | 0.137  | 0.142 | -0.077 | 0.112 | 0.029  | 0.177 |
| SYEP_HUMAN  | 2  | 0.107 | 0.028  | 0.051 | 0.099  | 0.163 | -0.111 | 0.113 |
| APEX1_HUMAN | 11 | 0.106 | 0.149  | 0.387 | 0.040  | 0.250 | -0.063 | 0.074 |
| NIBA_HUMAN  | 2  | 0.106 | -0.016 | 0.527 | -0.088 | 0.193 | 0.120  | 0.334 |
| HNRPM_HUMAN | 10 | 0.105 | 0.084  | 0.230 | -0.114 | 0.234 | 0.046  | 0.192 |
| MYO1G_HUMAN | 5  | 0.104 | 0.075  | 0.174 | -0.109 | 0.029 | 0.068  | 0.149 |
| TBCA_HUMAN  | 4  | 0.104 | -0.081 | 0.103 | -0.018 | 0.021 | 0.122  | 0.118 |
| LKHA4_HUMAN | 32 | 0.104 | -0.019 | 0.306 | 0.132  | 0.250 | -0.066 | 0.375 |
| SF3B2_HUMAN | 2  | 0.103 | 0.068  | 0.089 | -0.114 | 0.192 | 0.061  | 0.103 |
| HPT_HUMAN   | 17 | 0.103 | 0.110  | 0.278 | -0.010 | 0.232 | -0.095 | 0.328 |
| SMC3_HUMAN  | 6  | 0.101 | -0.013 | 0.209 | -0.215 | 0.456 | -0.105 | 0.239 |
| 6PGD_HUMAN  | 35 | 0.101 | 0.094  | 0.271 | 0.067  | 0.375 | -0.093 | 0.467 |
| MARCS_HUMAN | 8  | 0.101 | -0.049 | 0.235 | 0.122  | 0.146 | -0.057 | 0.161 |
| NGAL_HUMAN  | 22 | 0.101 | -0.069 | 0.230 | -0.016 | 0.706 | 0.127  | 0.764 |
| I2C1_HUMAN  | 2  | 0.100 | -0.079 | 0.323 | -0.020 | 0.025 | 0.115  | 0.348 |
| VPS35_HUMAN | 5  | 0.100 | -0.188 | 0.246 | -0.020 | 0.020 | -0.010 | 0.036 |
| NCKPL_HUMAN | 4  | 0.100 | 0.169  | 0.259 | -0.028 | 0.331 | 0.097  | 0.108 |
| TEBP_HUMAN  | 3  | 0.099 | 0.029  | 0.256 | 0.091  | 1.046 | -0.104 | 1.001 |
| PAX1_HUMAN  | 9  | 0.099 | 0.208  | 0.219 | 0.026  | 0.452 | 0.050  | 0.784 |
| IMA4_HUMAN  | 4  | 0.098 | -0.075 | 0.176 | 0.084  | 0.056 | 0.102  | 0.085 |
| GDIR1_HUMAN | 10 | 0.098 | 0.071  | 0.137 | -0.124 | 0.160 | -0.017 | 0.083 |
| SH3L3_HUMAN | 5  | 0.097 | 0.177  | 0.360 | -0.017 | 0.425 | 0.088  | 0.073 |
| ACON_HUMAN  | 5  | 0.097 | 0.089  | 0.010 | -0.101 | 0.192 | -0.039 | 0.529 |
| RFIP1_HUMAN | 2  | 0.097 | 0.105  | 0.037 | -0.089 | 0.085 | -0.001 | 0.048 |
| DDX17_HUMAN | 6  | 0.096 | 0.088  | 0.092 | -0.072 | 0.343 | 0.101  | 0.335 |
| LRCH4_HUMAN | 3  | 0.096 | 0.107  | 0.210 | -0.008 | 0.273 | -0.084 | 0.091 |
| DOCK2_HUMAN | 9  | 0.096 | 0.110  | 0.130 | -0.032 | 0.143 | -0.072 | 0.117 |
| ADHX_HUMAN  | 4  | 0.095 | -0.045 | 0.163 | 0.031  | 0.354 | 0.145  | 0.183 |
| GRP78_HUMAN | 13 | 0.095 | 0.109  | 0.475 | -0.016 | 0.494 | -0.077 | 0.427 |
| IMDH2_HUMAN | 6  | 0.095 | 0.105  | 0.154 | -0.069 | 0.022 | -0.049 | 0.154 |
| IMB1_HUMAN  | 11 | 0.095 | 0.096  | 0.120 | -0.063 | 0.162 | -0.074 | 0.125 |
| GIMA4_HUMAN | 4  | 0.095 | 0.010  | 0.208 | 0.145  | 0.217 | -0.037 | 0.129 |
| IL16_HUMAN  | 7  | 0.095 | 0.027  | 0.004 | -0.150 | 0.270 | -0.004 | 0.203 |
| IF4G1_HUMAN | 3  | 0.094 | -0.080 | 0.113 | 0.106  | 0.987 | -0.011 | 0.875 |
| CALM_HUMAN  | 9  | 0.094 | -0.144 | 0.547 | -0.008 | 0.218 | -0.188 | 0.316 |
| 1433E_HUMAN | 7  | 0.094 | -0.068 | 0.227 | 0.081  | 0.344 | 0.105  | 0.482 |
| CSK_HUMAN   | 4  | 0.093 | 0.082  | 0.046 | -0.062 | 0.941 | 0.113  | 0.749 |
| ARPC4_HUMAN | 7  | 0.093 | 0.109  | 0.264 | 0.122  | 0.071 | -0.046 | 0.294 |
| UAP56_HUMAN | 7  | 0.093 | 0.019  | 0.090 | -0.094 | 0.399 | 0.091  | 0.476 |
| SFRS1_HUMAN | 4  | 0.093 | 0.111  | 0.145 | -0.032 | 0.223 | -0.064 | 0.178 |
| RS3A_HUMAN  | 3  | 0.092 | 0.083  | 0.119 | 0.029  | 0.168 | -0.097 | 0.188 |
| UBIQ_HUMAN  | 8  | 0.092 | -0.019 | 0.135 | -0.073 | 0.375 | 0.107  | 0.361 |
| TALDO_HUMAN | 22 | 0.092 | -0.052 | 0.351 | -0.095 | 0.204 | 0.082  | 0.482 |
| PCBP1_HUMAN | 16 | 0.091 | 0.122  | 0.329 | -0.058 | 0.211 | 0.006  | 0.354 |
| MYL6_HUMAN  | 8  | 0.091 | -0.027 | 0.142 | -0.084 | 0.181 | 0.095  | 0.174 |
| DDX6_HUMAN  | 4  | 0.090 | 0.114  | 0.103 | 0.004  | 0.135 | -0.064 | 0.204 |
| TCP4_HUMAN  | 5  | 0.090 | -0.022 | 0.317 | -0.199 | 0.198 | -0.084 | 0.130 |
| RHG04_HUMAN | 9  | 0.090 | -0.089 | 0.154 | -0.140 | 0.225 | 0.034  | 0.343 |
| KPCD_HUMAN  | 8  | 0.088 | 0.105  | 0.126 | -0.054 | 0.174 | -0.041 | 0.146 |
| PSD7_HUMAN  | 4  | 0.088 | -0.100 | 0.108 | 0.041  | 0.054 | -0.121 | 0.328 |
| LBR_HUMAN   | 4  | 0.087 | -0.012 | 0.096 | -0.004 | 0.103 | -0.158 | 0.136 |
| MYPT1_HUMAN | 9  | 0.087 | -0.022 | 0.347 | 0.038  | 0.529 | -0.133 | 0.359 |
| PDIA4_HUMAN | 3  | 0.086 | 0.102  | 0.076 | -0.025 | 0.170 | -0.062 | 0.213 |
| IF16_HUMAN  | 4  | 0.086 | 0.032  | 0.008 | 0.090  | 0.139 | -0.079 | 0.112 |
| TPIS_HUMAN  | 14 | 0.085 | 0.109  | 0.252 | -0.061 | 0.426 | 0.011  | 0.295 |
| IRGQ_HUMAN  | 2  | 0.085 | 0.091  | 0.294 | -0.079 | 0.113 | 0.004  | 0.408 |
| UN84B_HUMAN | 4  | 0.085 | -0.009 | 0.091 | -0.102 | 0.073 | 0.068  | 0.145 |
| STAT3_HUMAN | 6  | 0.085 | 0.080  | 0.177 | 0.046  | 0.083 | -0.081 | 0.142 |
| TWF2_HUMAN  | 10 | 0.085 | -0.016 | 0.411 | -0.067 | 0.701 | 0.099  | 0.862 |
| FNTA_HUMAN  | 2  | 0.084 | 0.103  | 0.103 | -0.048 | 0.013 | -0.039 | 0.090 |
| NAGK_HUMAN  | 7  | 0.084 | 0.007  | 0.210 | 0.168  | 0.798 | 0.044  | 0.905 |
| KAPCA_HUMAN | 3  | 0.084 | -0.087 | 0.095 | 0.077  | 0.469 | 0.025  | 0.374 |
| GDI_A_HUMAN | 3  | 0.083 | 0.090  | 0.286 | 0.001  | 0.250 | -0.076 | 0.182 |
| ARPC3_HUMAN | 6  | 0.081 | 0.090  | 0.362 | 0.160  | 0.050 | -0.001 | 0.467 |
| PAK1_HUMAN  | 2  | 0.079 | -0.021 | 0.145 | 0.094  | 0.319 | -0.058 | 0.173 |
| ANR44_HUMAN | 4  | 0.078 | 0.015  | 0.094 | -0.067 | 0.068 | -0.141 | 0.157 |
| PPIA_HUMAN  | 16 | 0.076 | -0.050 | 0.329 | 0.097  | 0.448 | 0.052  | 0.529 |
| KCC2G_HUMAN | 5  | 0.075 | -0.017 | 0.248 | 0.089  | 0.316 | -0.057 | 0.557 |
| ADDG_HUMAN  | 3  | 0.075 | -0.048 | 0.341 | 0.091  | 0.380 | -0.028 | 0.473 |
| KAP2_HUMAN  | 2  | 0.075 | 0.003  | 0.256 | 0.081  | 0.052 | -0.069 | 0.205 |
| TBB2C_HUMAN | 2  | 0.074 | 0.005  | 0.113 | -0.068 | 0.194 | 0.079  | 0.081 |
| PTN6_HUMAN  | 17 | 0.073 | 0.077  | 0.244 | -0.070 | 0.356 | 0.011  | 0.348 |
| RS6_HUMAN   | 3  | 0.073 | -0.078 | 0.330 | 0.061  | 0.083 | 0.032  | 0.269 |
| TES_HUMAN   | 6  | 0.072 | 0.032  | 0.061 | -0.110 | 0.259 | -0.020 | 0.244 |
| SQRD_HUMAN  | 3  | 0.071 | 0.081  | 0.237 | -0.060 | 0.088 | -0.005 | 0.242 |
| TBA1B_HUMAN | 36 | 0.071 | -0.038 | 0.293 | 0.086  | 0.278 | -0.036 | 0.469 |
| FMNL_HUMAN  | 7  | 0.071 | -0.049 | 0.677 | -0.155 | 0.050 | -0.021 | 0.734 |
| ARHL2_HUMAN | 2  | 0.070 | -0.016 | 0.041 | 0.083  | 0.030 | -0.052 | 0.071 |

|              |    |       |        |       |        |       |        |       |
|--------------|----|-------|--------|-------|--------|-------|--------|-------|
| CLAP2_HUMAN  | 3  | 0.069 | -0.010 | 0.098 | 0.081  | 0.103 | -0.055 | 0.070 |
| ERO1A_HUMAN  | 6  | 0.069 | 0.152  | 0.388 | 0.114  | 0.006 | 0.018  | 0.147 |
| RB11B_HUMAN  | 6  | 0.067 | -0.042 | 0.144 | 0.044  | 0.165 | 0.091  | 0.055 |
| ARF1_HUMAN   | 8  | 0.067 | -0.102 | 0.193 | 0.022  | 0.202 | -0.086 | 0.693 |
| HXK3_HUMAN   | 22 | 0.067 | 0.082  | 0.421 | -0.029 | 0.456 | -0.037 | 0.702 |
| DHAK_HUMAN   | 6  | 0.067 | -0.054 | 0.221 | -0.053 | 0.132 | 0.062  | 0.119 |
| VATB2_HUMAN  | 3  | 0.066 | 0.068  | 0.059 | -0.032 | 0.184 | 0.093  | 0.050 |
| STAT1_HUMAN  | 2  | 0.064 | -0.054 | 0.718 | -0.004 | 0.829 | 0.073  | 0.111 |
| ARC1B_HUMAN  | 18 | 0.064 | -0.056 | 0.363 | 0.053  | 0.286 | 0.057  | 0.546 |
| MY18A_HUMAN  | 3  | 0.064 | -0.055 | 0.308 | 0.072  | 0.328 | -0.002 | 0.021 |
| GNAI2_HUMAN  | 16 | 0.064 | 0.035  | 0.276 | -0.069 | 0.243 | 0.047  | 0.430 |
| PSMD3_HUMAN  | 2  | 0.064 | -0.011 | 0.254 | 0.075  | 0.475 | -0.049 | 0.730 |
| CRIS3_HUMAN  | 14 | 0.063 | -0.015 | 0.479 | -0.088 | 0.225 | 0.038  | 0.568 |
| CENB1_HUMAN  | 4  | 0.063 | -0.073 | 0.099 | -0.138 | 0.215 | -0.012 | 0.062 |
| COR1A_HUMAN  | 30 | 0.063 | 0.039  | 0.366 | -0.082 | 0.386 | 0.008  | 0.634 |
| FKB1A_HUMAN  | 4  | 0.063 | 0.045  | 0.333 | 0.000  | 0.063 | -0.079 | 0.031 |
| SPTB2_HUMAN  | 21 | 0.062 | 0.027  | 0.239 | -0.053 | 0.188 | 0.070  | 0.225 |
| CRLF3_HUMAN  | 4  | 0.062 | 0.085  | 0.086 | 0.143  | 0.014 | 0.019  | 0.284 |
| RL12_HUMAN   | 2  | 0.062 | 0.041  | 0.079 | 0.041  | 0.225 | -0.066 | 0.147 |
| RANG_HUMAN   | 2  | 0.060 | 0.031  | 0.004 | -0.064 | 0.020 | 0.048  | 0.016 |
| LASP1_HUMAN  | 11 | 0.060 | 0.109  | 0.208 | -0.005 | 0.107 | 0.021  | 0.052 |
| MYO1F_HUMAN  | 11 | 0.060 | -0.079 | 0.221 | -0.061 | 0.258 | 0.032  | 0.156 |
| MNDA_HUMAN   | 29 | 0.059 | 0.058  | 0.261 | -0.061 | 0.259 | 0.004  | 0.402 |
| HCLS1_HUMAN  | 15 | 0.059 | -0.038 | 0.281 | 0.011  | 0.297 | 0.080  | 0.227 |
| HS90B_HUMAN  | 12 | 0.059 | 0.071  | 0.244 | -0.015 | 0.704 | -0.041 | 0.558 |
| TS101_HUMAN  | 2  | 0.058 | 0.020  | 0.014 | 0.054  | 0.035 | -0.059 | 0.021 |
| GSTO1_HUMAN  | 10 | 0.057 | 0.016  | 0.210 | 0.070  | 0.225 | -0.044 | 0.331 |
| ARPC2_HUMAN  | 25 | 0.057 | -0.039 | 0.393 | 0.054  | 0.517 | 0.064  | 0.333 |
| ANXA1_HUMAN  | 34 | 0.056 | -0.042 | 0.267 | 0.046  | 0.234 | -0.060 | 0.348 |
| GMIIP_HUMAN  | 2  | 0.056 | -0.049 | 0.064 | 0.002  | 0.024 | 0.063  | 0.088 |
| UBP5_HUMAN   | 2  | 0.056 | 0.041  | 0.196 | 0.033  | 0.051 | -0.059 | 0.146 |
| G6PD_HUMAN   | 27 | 0.055 | -0.024 | 0.344 | 0.005  | 0.505 | 0.082  | 0.383 |
| HMHAI1_HUMAN | 8  | 0.054 | 0.040  | 0.226 | 0.148  | 0.119 | 0.092  | 0.457 |
| GELS_HUMAN   | 47 | 0.054 | 0.015  | 0.305 | -0.080 | 0.315 | 0.012  | 0.446 |
| CLIC1_HUMAN  | 8  | 0.053 | 0.040  | 0.128 | 0.027  | 0.175 | -0.058 | 0.206 |
| PGM2_HUMAN   | 10 | 0.052 | -0.032 | 0.094 | -0.017 | 0.551 | 0.064  | 0.608 |
| XRN2_HUMAN   | 2  | 0.050 | -0.050 | 0.068 | 0.019  | 0.076 | 0.047  | 0.008 |
| BUB3_HUMAN   | 5  | 0.050 | -0.089 | 0.359 | -0.120 | 0.065 | -0.023 | 0.405 |
| IQGA2_HUMAN  | 3  | 0.050 | 0.058  | 0.061 | -0.002 | 0.137 | -0.041 | 0.181 |
| ICAL_HUMAN   | 7  | 0.049 | -0.139 | 0.073 | -0.051 | 0.195 | -0.057 | 0.280 |
| RS27_HUMAN   | 2  | 0.049 | -0.032 | 0.003 | -0.014 | 0.125 | 0.061  | 0.127 |
| PLSL_HUMAN   | 71 | 0.048 | 0.024  | 0.345 | -0.042 | 0.561 | 0.052  | 0.546 |
| SVVC_HUMAN   | 3  | 0.048 | 0.027  | 0.223 | 0.039  | 0.088 | -0.050 | 0.272 |
| UBE2N_HUMAN  | 2  | 0.048 | 0.010  | 0.158 | 0.051  | 0.042 | -0.045 | 0.116 |
| IF4B_HUMAN   | 2  | 0.048 | 0.050  | 0.026 | 0.010  | 0.130 | -0.045 | 0.104 |
| TADBP_HUMAN  | 2  | 0.047 | 0.042  | 0.050 | 0.021  | 0.120 | -0.048 | 0.171 |
| UGGG1_HUMAN  | 5  | 0.046 | -0.055 | 0.250 | -0.040 | 0.211 | 0.031  | 0.043 |
| SPTA2_HUMAN  | 31 | 0.046 | -0.071 | 0.193 | 0.005  | 0.260 | 0.011  | 0.339 |
| HSP7C_HUMAN  | 23 | 0.046 | -0.055 | 0.330 | -0.010 | 0.497 | 0.037  | 0.506 |
| NAMPT_HUMAN  | 14 | 0.045 | 0.017  | 0.460 | -0.025 | 0.252 | -0.073 | 0.449 |
| HMGB2_HUMAN  | 11 | 0.044 | -0.008 | 0.146 | 0.056  | 0.154 | -0.027 | 0.241 |
| PSD11_HUMAN  | 5  | 0.043 | 0.051  | 0.307 | -0.035 | 0.267 | 0.000  | 0.527 |
| RHOA_HUMAN   | 7  | 0.043 | 0.023  | 0.148 | 0.107  | 0.262 | 0.077  | 0.444 |
| PDSSA_HUMAN  | 2  | 0.041 | -0.033 | 0.285 | 0.000  | 0.087 | 0.048  | 0.198 |
| CAPZB_HUMAN  | 15 | 0.040 | 0.061  | 0.129 | -0.002 | 0.209 | -0.014 | 0.226 |
| CAP1_HUMAN   | 22 | 0.040 | 0.004  | 0.231 | 0.076  | 0.483 | 0.011  | 0.615 |
| PRDX5_HUMAN  | 14 | 0.040 | -0.069 | 0.344 | -0.023 | 0.173 | 0.011  | 0.278 |
| TBB5_HUMAN   | 30 | 0.039 | -0.005 | 0.381 | 0.014  | 0.396 | -0.062 | 0.474 |
| ARP3_HUMAN   | 18 | 0.039 | 0.040  | 0.258 | -0.026 | 0.164 | -0.028 | 0.301 |
| ALDOA_HUMAN  | 37 | 0.039 | -0.110 | 0.417 | -0.078 | 0.242 | -0.033 | 0.431 |
| WASP_HUMAN   | 3  | 0.038 | -0.039 | 0.069 | 0.026  | 0.015 | 0.028  | 0.071 |
| MARE1_HUMAN  | 4  | 0.038 | 0.033  | 0.169 | -0.041 | 0.027 | -0.020 | 0.531 |
| PRS10_HUMAN  | 3  | 0.037 | 0.001  | 0.259 | -0.030 | 0.598 | 0.044  | 0.347 |
| BTX_HUMAN    | 2  | 0.036 | 0.045  | 0.087 | -0.005 | 0.129 | -0.025 | 0.215 |
| SF3A1_HUMAN  | 4  | 0.036 | -0.051 | 0.061 | -0.014 | 0.107 | 0.021  | 0.194 |
| SMRC2_HUMAN  | 3  | 0.035 | 0.036  | 0.376 | 0.012  | 0.271 | -0.033 | 0.399 |
| TCPH_HUMAN   | 4  | 0.035 | 0.006  | 0.012 | -0.057 | 0.217 | -0.001 | 0.197 |
| ZZEF1_HUMAN  | 2  | 0.034 | 0.043  | 0.343 | -0.003 | 0.204 | -0.024 | 0.548 |
| ALO17_HUMAN  | 2  | 0.034 | 0.044  | 0.041 | -0.017 | 0.202 | -0.011 | 0.243 |
| BRD4_HUMAN   | 3  | 0.032 | 0.041  | 0.136 | -0.021 | 0.245 | -0.005 | 0.156 |
| DOCK8_HUMAN  | 3  | 0.032 | 0.030  | 0.177 | -0.030 | 0.268 | 0.015  | 0.414 |
| PROP_HUMAN   | 5  | 0.024 | -0.055 | 0.157 | -0.021 | 0.124 | -0.007 | 0.040 |
| PA2G4_HUMAN  | 7  | 0.024 | -0.049 | 0.060 | -0.005 | 0.070 | -0.012 | 0.406 |
| CALX_HUMAN   | 13 | 0.023 | 0.031  | 0.258 | -0.006 | 0.291 | -0.010 | 0.329 |
| RL18_HUMAN   | 2  | 0.022 | -0.004 | 0.096 | -0.012 | 0.329 | 0.031  | 0.233 |
| SYFA_HUMAN   | 2  | 0.020 | 0.012  | 0.266 | 0.021  | 1.239 | -0.017 | 0.973 |
| HMGB1_HUMAN  | 8  | 0.019 | -0.033 | 0.279 | -0.037 | 0.154 | -0.067 | 0.203 |
| RHOG_HUMAN   | 2  | 0.018 | -0.013 | 0.070 | 0.023  | 0.254 | 0.006  | 0.323 |
| THIK_HUMAN   | 3  | 0.018 | 0.009  | 0.273 | 0.021  | 0.251 | -0.014 | 0.145 |
| VASP_HUMAN   | 19 | 0.017 | -0.026 | 0.387 | 0.005  | 0.326 | -0.025 | 0.525 |
| ENOA_HUMAN   | 43 | 0.017 | -0.030 | 0.279 | 0.003  | 0.499 | -0.023 | 0.577 |
| HDGF_HUMAN   | 11 | 0.017 | 0.019  | 0.164 | -0.015 | 0.184 | -0.001 | 0.257 |
| RLA2_HUMAN   | 5  | 0.012 | 0.018  | 0.401 | 0.003  | 0.167 | -0.006 | 0.493 |
| CNN2_HUMAN   | 7  | 0.010 | 0.059  | 0.152 | 0.078  | 0.178 | 0.075  | 0.287 |
| PTN18_HUMAN  | 2  | 0.010 | 0.013  | 0.253 | -0.006 | 0.054 | 0.008  | 0.307 |
| PSMD2_HUMAN  | 6  | 0.009 | 0.000  | 0.144 | -0.016 | 0.264 | -0.014 | 0.238 |
